# Supplementary material for: High-fat-diet-associated intestinal microbiota exacerbates psoriasis-like inflammation by enhancing systemic γδ T cell IL-17 production
Source: PubMed Central journal article supplement — Cell Rep. 2023 Jul 7;42(7):112713. doi: 10.1016/j.celrep.2023.112713 (PMC10391630; doi:10.1016/j.celrep.2023.112713), 2023-07-07
Supplement: mmc2.pdf [file mmc2.pdf]

# High-fat-diet-associated intestinal microbiota exacerbates psoriasis-like inflammation by enhancing systemic $\gamma\delta$ T cell IL-17 production

## Graphical abstract

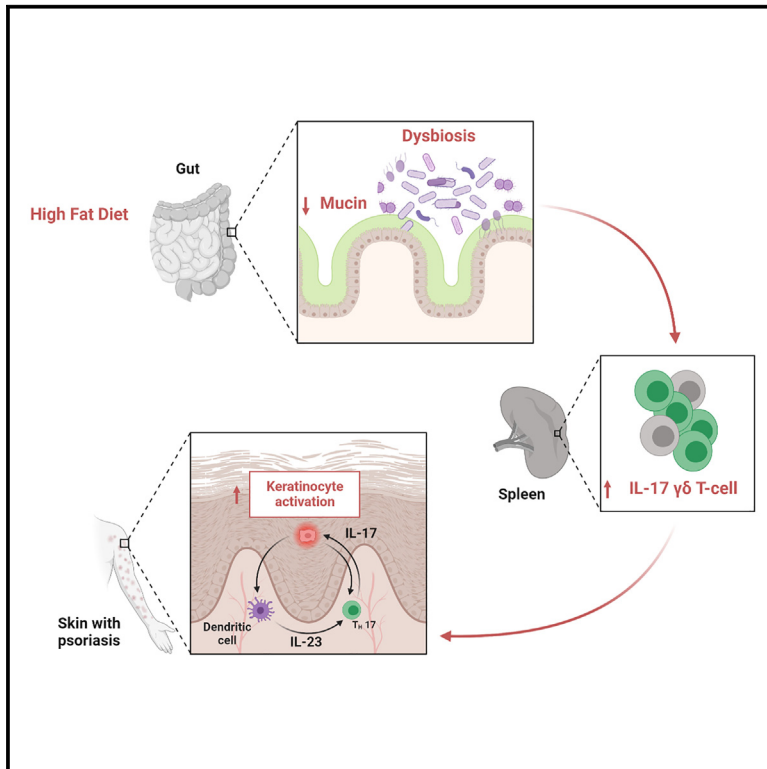

## Authors

Koshiro Sonomoto, Rui Song, Daniel Eriksson, ..., Georg Schett, Didier Soulat, Aline Bozec

## Correspondence

aline.bozec@uk-erlangen.de

## In brief

Sonomoto et al. show that high-fat diet (HFD) facilitates a systemic IL-17-mediated  $\gamma\delta$  T cell response in an intestine-dependent manner, exacerbating psoriasis-like inflammation. Administration of *Akkermansia muciniphila* effectively suppressed HFD-induced enhancement of psoriatic disease through intestinal microenvironment improvement.

## Highlights

- HFD exacerbates psoriasis-like skin inflammation by inducing systemic IL-17  $\gamma\delta$ T cell response
- HFD altering the intestinal mucus barrier and flora promotes psoriatic skin inflammation
- Vancomycin treatment effectively blocks the activation of psoriatic skin inflammation by HFD
- *Akkermansia muciniphila* administration inhibits HFD-induced enhancement of psoriatic disease

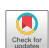

## Article

# High-fat-diet-associated intestinal microbiota exacerbates psoriasis-like inflammation by enhancing systemic $\gamma\delta$ T cell IL-17 production

Koshiro Sonomoto,<sup>1,2,6,7,9</sup> Rui Song,<sup>1,2,9</sup> Daniel Eriksson,<sup>1,2</sup> Anne M. Hahn,<sup>3</sup> Xianyi Meng,<sup>1,2</sup> Pang Lyu,<sup>1,2</sup> Shan Cao,<sup>1,2</sup> Ning Liu,<sup>1,2</sup> R. Verena Taudte,<sup>4,10</sup> Stefan Wirtz,<sup>5</sup> Yoshiya Tanaka,<sup>6</sup> Thomas H. Winkler,<sup>3</sup> Georg Schett,<sup>1,2</sup> Didier Soulat,<sup>8</sup> and Aline Bozec<sup>1,2,11,\*</sup>

<sup>1</sup>Department of Internal Medicine 3 – Rheumatology and Immunology, Friedrich-Alexander-University Erlangen-Nürnberg and Universitätsklinikum Erlangen, Erlangen, Germany

<sup>2</sup>Deutsche Zentrum für Immuntherapie, Friedrich-Alexander-University Erlangen-Nürnberg and Universitätsklinikum Erlangen, Erlangen, Germany

<sup>3</sup>Division of Genetics, Department of Biology, Friedrich-Alexander-University Erlangen-Nürnberg, Erlangen, Germany

<sup>4</sup>Institute for Experimental und Clinical Pharmacology and Toxicology, Friedrich-Alexander-University Erlangen-Nürnberg, Erlangen, Germany

<sup>5</sup>Department of Internal Medicine 1 - Gastroenterology, Pneumology and Endocrinology, Friedrich-Alexander-University Erlangen-Nürnberg and Universitätsklinikum Erlangen, Erlangen, Germany

<sup>6</sup>Department of Internal Medicine, School of Medicine, University of Occupational and Environmental Health, Kitakyushu, Japan

<sup>7</sup>The Department of Clinical Nursing, School of Health Sciences, University of Occupational and Environmental Health, Fukuoka, Japan

<sup>8</sup>Institute of Clinical Microbiology, Immunology and Hygiene, Friedrich-Alexander-University Erlangen-Nürnberg and Universitätsklinikum Erlangen, Erlangen, Germany

<sup>9</sup>These authors contributed equally

<sup>10</sup>Present Address: Core Facility for Metabolomics, Department of Medicine, Philipps University Marburg, Marburg, Germany

<sup>11</sup>Lead contact

\*Correspondence: [aline.bozec@uk-erlangen.de](mailto:aline.bozec@uk-erlangen.de)

<https://doi.org/10.1016/j.celrep.2023.112713>

## SUMMARY

Although it is known that psoriasis is strongly associated with obesity, the mechanistic connection between diet and skin lesions is not well established. Herein, we showed that only dietary fat, not carbohydrates or proteins, exacerbates psoriatic disease. Enhanced psoriatic skin inflammation was associated with changes in the intestinal mucus layer and microbiota composition by high-fat diet (HFD). Change of intestinal microbiota by vancomycin treatment effectively blocked activation of psoriatic skin inflammation by HFD, inhibited the systemic interleukin-17 (IL-17) response, and led to increased mucophilic bacterial species such as *Akkermansia muciniphila*. By using IL-17 reporter mice, we could show that HFD facilitates IL-17-mediated  $\gamma\delta$  T cell response in the spleen. Notably, oral gavage with live or heat-killed *A. muciniphila* effectively inhibited HFD-induced enhancement of psoriatic disease. In conclusion, HFD exacerbates psoriatic skin inflammation through changing the mucus barrier and the intestine microbial composition, which leads to an enhanced systemic IL-17 response.

## INTRODUCTION

Psoriasis is a systemic immune-mediated inflammatory disease affecting the skin, joints, and cardiovascular system.<sup>1</sup> While a substantial part of the susceptibility to psoriasis is based on genetic factors, such as HLA class I alleles and interleukin-23 (IL-23) receptor variants, it is also remarkably associated with metabolic disturbances.<sup>1</sup> Thus, (1) obesity, diabetes, and lipid metabolism abnormalities are highly prevalent in patients with psoriasis, who also show an increased cardiovascular risk, despite no or only small elevation of systemic markers of inflammation.<sup>1</sup> Furthermore, (2) the level of response to anti-inflammatory treatment depends on the level of metabolic disturbances in patients with psoriasis.<sup>2</sup> In addition, (3) dietary measures have

been shown to improve the response to anti-inflammatory treatment in patients with psoriasis.<sup>3</sup> To date, little is known about the pathogenesis of metabolic disturbances in psoriasis and how they might interact with inflammation.

Diet-induced changes of the intestinal microbiota may explain the link between metabolic changes and inflammation in psoriatic disease. Changes in the intestinal microbiome have been reported in both patients with psoriasis<sup>4</sup> and psoriatic arthritis.<sup>5</sup> Indeed, intestinal microbiota is known to regulate host metabolism. For example, germ-free mice colonized by intestinal microbiota gain body mass.<sup>6</sup> The taxonomic analysis of intestinal microbiomes in mice and humans revealed that in individuals who are obese, the relation between *Bacteroidetes* and *Firmicutes* shifts to the latter one, which is referred to as intestinal

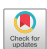

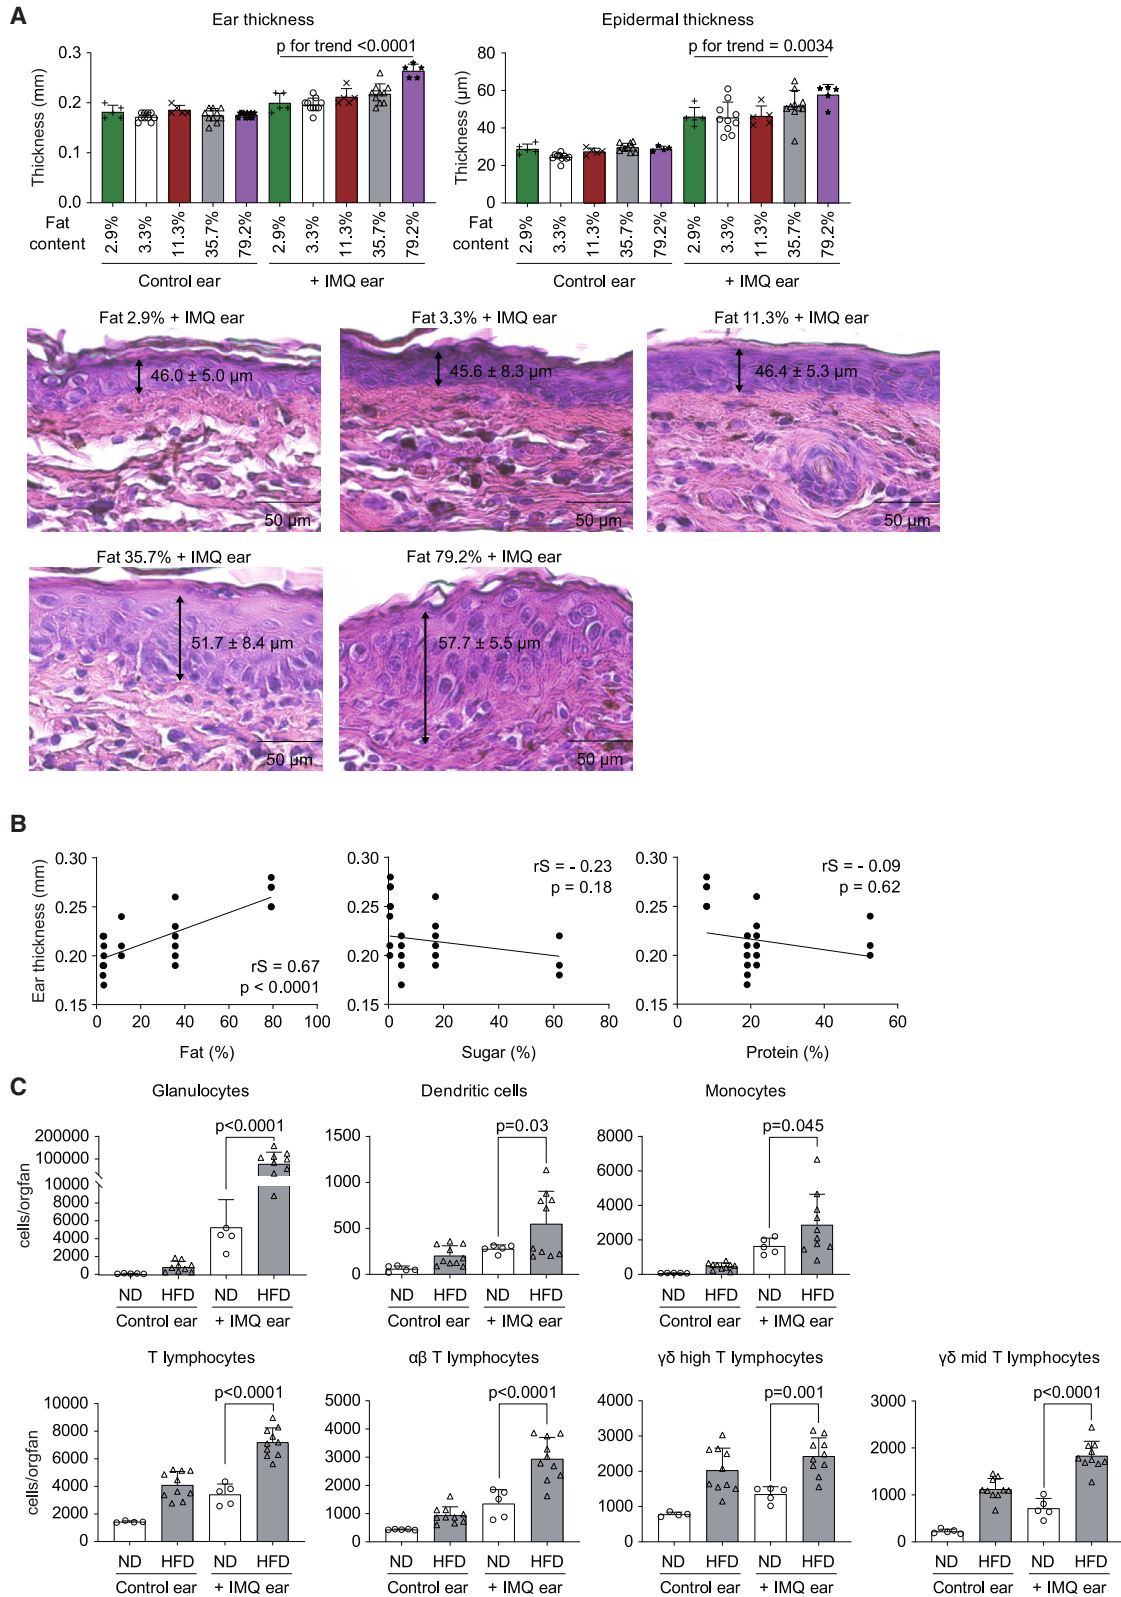

(legend on next page)

dysbiosis.<sup>7,8</sup> Furthermore, modulation of the intestinal microbiota can influence diseases such as atherosclerosis and diabetes in mice and, to some extent, also in humans.<sup>9,10</sup> Some intestinal bacterial species seem to influence the homeostasis in the gut toward a homeostatic anti-inflammatory milieu. *Akkermansia* (*A.*) *mu*ciniphila, for instance, is a gram-negative, strictly anaerobic bacterium that accounts for 1%–5% of human intestinal microbes.<sup>11,12</sup> *A. muciniphila* can metabolize dietary fibers to produce short-chain fatty acids that will modulate the mucosal gene expression profile of the host. As a consequence, these bacteria directly participate in the maintenance of the gut barrier function, the host immune response, and other homeostatic functions.<sup>13</sup> Furthermore, *A. muciniphila* treatment has been shown to counteract the increased circulating endotoxin level induced by high-fat diet (HFD).<sup>14</sup>

Of note, bacterial endotoxins are also an important stimulator of IL-23 secretion and sufficient to induce IL-17 secretion by  $\gamma\delta$  T cells,<sup>15</sup> both of which represent the key two inflammatory mediators in psoriatic disease. Therefore, we sought for a mechanistic link between metabolic changes and inflammation in psoriasis and investigated how diet-induced changes of the gut microbiota influence psoriatic skin inflammation by investigating their effects on the key immune effectors in this disease.

## RESULTS

### HFD exacerbates psoriasis-like skin inflammation

To assess the effects of dietary metabolic stress on psoriatic dermatitis, C57BL/6 male mice were fed diets high in fat, protein, or carbohydrates for 8 weeks. At the end of dietary exposure, mice were challenged to the ear imiquimod (IMQ) model for 3 days since immune cell infiltration in the ear was similar 3, 5, and 7 days post-treatment (Figure S1A). Skin inflammation was determined by measurement of ear thickness and histopathology. Intriguingly, only the fat-enriched diet significantly and dose-dependently exacerbated IMQ-induced skin inflammation (Figure 1A). Hence, ear thickness and histological changes increased with higher dietary fat content (Figure 1A). Significant differences were found between HFD (35.7% fat) and normal diet (ND; 3.3% fat) (Figures S1B and S1C). This phenotype was accompanied by weight gain and impaired glucose tolerance and insulin response in mice fed an HFD (Figures S1D–S1F). In contrast to the HFD, the sugar- or protein-enriched diet did not aggravate psoriatic skin inflammation (Figure 1B). Fluorescence-activated cell sorting (FACS)-based quantification of lesional immune cell infiltration revealed that neutrophils, dendritic cells, monocytes, and  $\alpha\beta$  and  $\gamma\delta$  T cells were significantly enriched in the skin lesions after HFD (Figure 1C). Details for gating for the various immune cell subsets are shown in Figures S2A and S2B.

Quantification of lesional mRNA levels of inflammatory cytokines and chemokines showed that dietary metabolic stress (HFD; 35.7% fat) increased IMQ-induced upregulation of *Il17a* mRNA levels (Figure S3A). Other inflammatory mediators such as *Il23*, *Il6*, tumor necrosis factor  $\alpha$  (*Tnfa*), or *Gcsf* were not significantly affected (Figure S3A). However, analysis of chemokine expression showed that *Cxcl1* and *Cxcl2*, which attract neutrophils, monocytes, and T cells, were significantly more highly expressed after HFD (Figure S3B). In contrast, no differences in *Cxcl3*, *Cxcl5*, *Ccl4*, and *Ccl20* were observed (Figure S3B).

### Induction of a systemic IL-17 T cell response by HFD

When measuring IL-17 serum levels following IMQ challenge, we found that they increased in mice fed an HFD for 8 weeks compared with mice fed an ND (Figure 2A). To determine the main source of IL-17 in this context, we used IL-17A-IRES-GFP-knockin (KI) reporter mice and analyzed IL-17 production in different organs. IL-17 was produced in a wide range of organs. It was significantly increased in the spleen and, to a lower extent, in the mesenteric lymph nodes (mLNs) of mice exposed to HFD (Figure 2B). The spleen was the main source of IL-17 production in mice exposed to HFD (Figure 2C). This increase was based on IL-17<sup>+</sup>  $\gamma\delta$  T cells but not IL-17<sup>+</sup>  $\alpha\beta$  T cells or IL-17<sup>+</sup> non-T cells (Figures 2D–2G and S4A–S4C). To delineate whether HFD alone affects IL-17 production, we analyzed the effect of HFD on IL-17<sup>+</sup> cells and IL-17 production in the absence of IMQ. Interestingly, HFD induced IL-17 production, with the spleen being again the main source for IL-17 production (Figures S4D and S4E). At the cellular level, we identified  $\gamma\delta$  T cells as the key producer of IL-17 in response to HFD (Figures S4F–S4I). The subtyping analyses of  $\gamma\delta$  T cells by V $\gamma$  chains revealed that V $\gamma$ 4<sup>+</sup> and V $\gamma$ 1<sup>–</sup>V $\gamma$ 4<sup>–</sup>  $\gamma\delta$  T cells, which are capable of producing IL-17, were increased after HFD (Figure S4I). In contrast, the number of interferon  $\gamma$  (IFN- $\gamma$ )-producing V $\gamma$ 1 T cells was not changed (Figures S4I and S4J). In addition, no clonal expansion of  $\gamma\delta$  T cells was observed in  $\gamma\delta$  TCR repertoire analysis after HFD (Figures S5A–S5C). Next, we performed an adoptive transfer of splenic T cells isolated from ND- or HFD-fed IL-17A-GFP mice into ND mice (Figures S6A and S6B). However, we noticed that adoptively transferred donor IL-17A<sup>+</sup>  $\gamma\delta$  T cells from HFD into ND mice were recruited to the spleen and the IMQ ear rather than other lymphoid organs such as mLNs (Figures S6C–S6E). Altogether, HFD aggravates systemic IL-17 response by stimulating IL-17 production by  $\gamma\delta$  T cells and their recruitment to the spleen and the skin-inflamed site.

### HFD impairs the intestinal mucus barrier

Mechanistically, we hypothesized that the systemic production of IL-17 by T cells following HFD was initiated by an

#### Figure 1. High-fat diet exacerbates psoriatic skin inflammation

C57BL/6 mice were fed a normal diet (2.9% or 3.3% fat content) or high-fat diet (11.3%, 35.7%, or 79.2% fat content) for 7–10 weeks. Mice were topically treated with imiquimod (IMQ) cream on one ear for the last 3 days of the experiment, while the contralateral ear remained unchallenged (n = 5–10 per group).

(A) Ear thickness measured by caliper and quantification of epidermal thickness in histopathology sections shown. Bars show the mean  $\pm$  SD. p values were calculated by analysis of variance followed by Jonckheere-Terpstra test. Representative H&E staining of IMQ-treated ears are also shown.

(B) Correlation between fat, sugar, and protein contents of the food and ear thickness. Spearman's rank correlation coefficient (rS) and p values are shown.

(C) Numbers of immune cells in IMQ-challenged and unchallenged contralateral ears of mice fed with normal diet (ND; 3.3% fat) or high-fat diet (HFD; 35.7% fat) (n = 10). Bars show the mean  $\pm$  SD. p values were calculated by unpaired Student's t test.

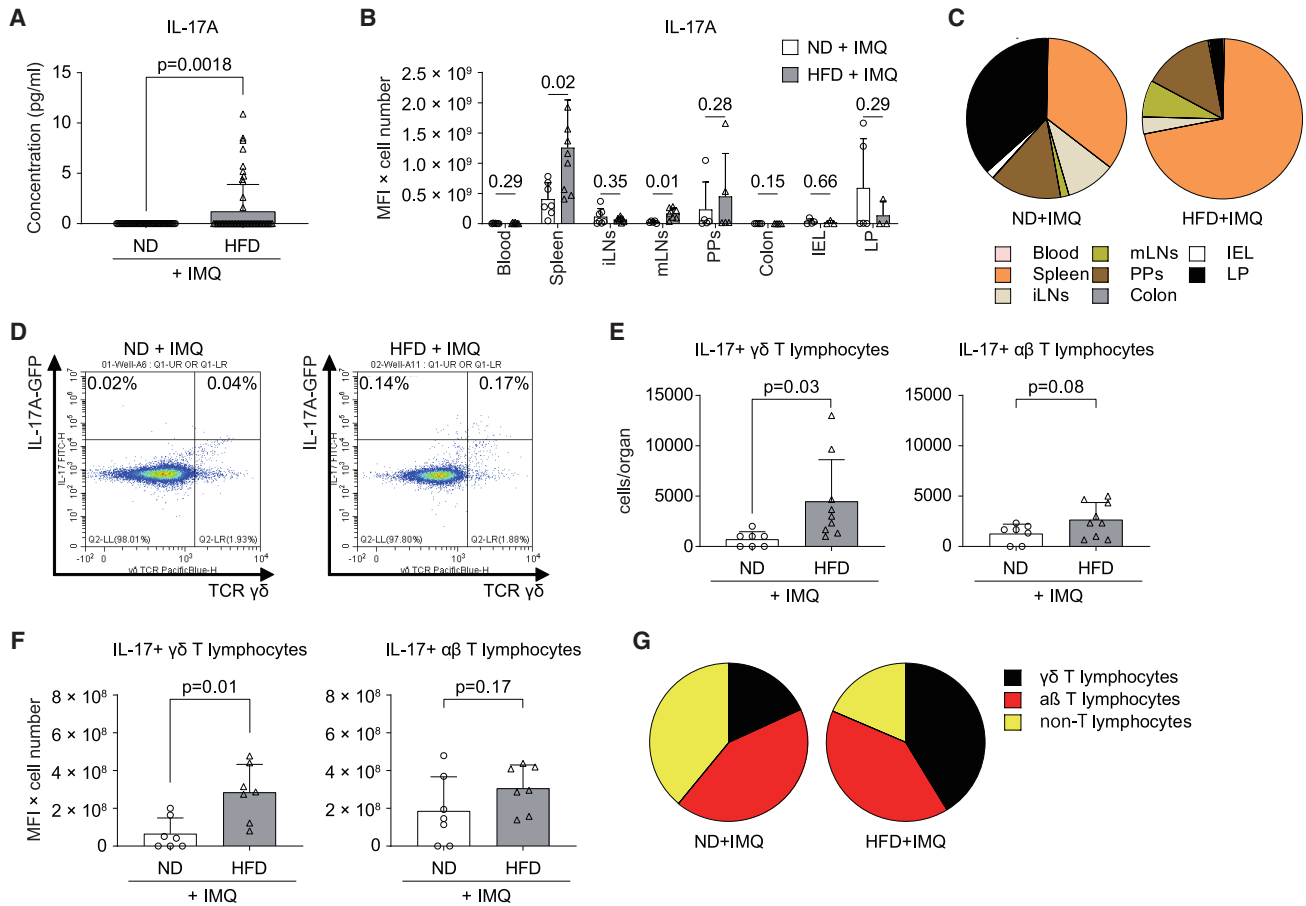

**Figure 2. Induction of  $\gamma\delta$  T lymphocytes by HFD**

(A) IL-17 serum levels in C57BL/6 mice fed an ND (3.3% fat) or HFD (35.7% fat) after the 3 day challenge with IMQ ( $n = 60$ ). (B and C) IL-17 production from different organs (B) and contribution of organs to IL-17 production (C) in IL-17 reporter mice fed an ND or HFD 3 days after being challenged with IMQ ( $n = 5-9$ ). IL-17 production is defined as FITC-mean fluorescence intensity (MFI)  $\times$  IL-17A<sup>+</sup> cell number. (D) Representative dot plot showing IL-17<sup>+</sup>  $\gamma\delta$ <sup>+</sup> T lymphocytes pregated on CD3<sup>+</sup> T cells in the spleen of mice fed an ND or HFD and challenged with IMQ. (E and F) Number (E) and level (F) of IL-17 production (MFI) of IL-17<sup>+</sup>  $\gamma\delta$  and  $\alpha\beta$  T lymphocytes in the spleen ( $n = 7-9$ ). (G) Contribution of IL-17-expressing cells to IL-17 production in the spleen. Bars show the mean  $\pm$  SD.  $p$  values were calculated by Welch's  $t$  test (A) or unpaired Student's  $t$  tests (B, E, and F) and are shown above each group.

alteration of the small intestine since it absorbs fat from the food. To test this idea, we gave 4 kDa fluorescein isothiocyanate (FITC)-labeled dextran to mice to evaluate the intestinal barrier function mediated by tight junctions. However, intestinal permeability was intact after 8 weeks of HFD (Figure S7A). Next, the quality of the mucin barrier was evaluated. Histologic analyses revealed a thick and smooth mucin layer on the edges of the villi in the small intestine of normally fed mice, whereas only a thin, rough, and intermittent mucin layer, accompanied by fewer mucin-producing cells, was observed in the intestine of mice fed with HFD, irrespective of IMQ ear challenge (Figure 3A). In parallel, we observed a marked lipid droplet accumulation in the mucosa of HFD-fed mice (Figure 3A), indicating disruption of the intestinal architecture and possibly inducing inflammation across the mucosa, as reported in previous studies.<sup>16</sup> These observations were correlated with decreased levels of Mucin-2 protein (Figure 3B)

and decreased expression of *Mucin-2*, -3, -4, and -13 mRNA in the intestine (Figure 3C), whereas the expression profiles of pro-inflammatory cytokines were unchanged (Figure S7B). Altogether, these data suggest that HFD impaired the mucus barrier in the gut.

### Exacerbation of psoriatic skin inflammation by HFD depends on the intestine

Based on our findings on the mucus barrier of the gut, we next investigated whether intestinal microbiota could participate in the exacerbation of psoriatic skin lesions by HFD. Therefore, we treated mice with the antibiotic vancomycin (VCM) in drinking water to specifically target gram-positive bacteria locally in the intestine. HFD-induced weight gain was still present with VCM treatment (Figure S8A). Of note, VCM treatment suppressed HFD-induced skin inflammation following IMQ challenge, as shown by the rescue of ear and epidermal thickening (Figure 4A).

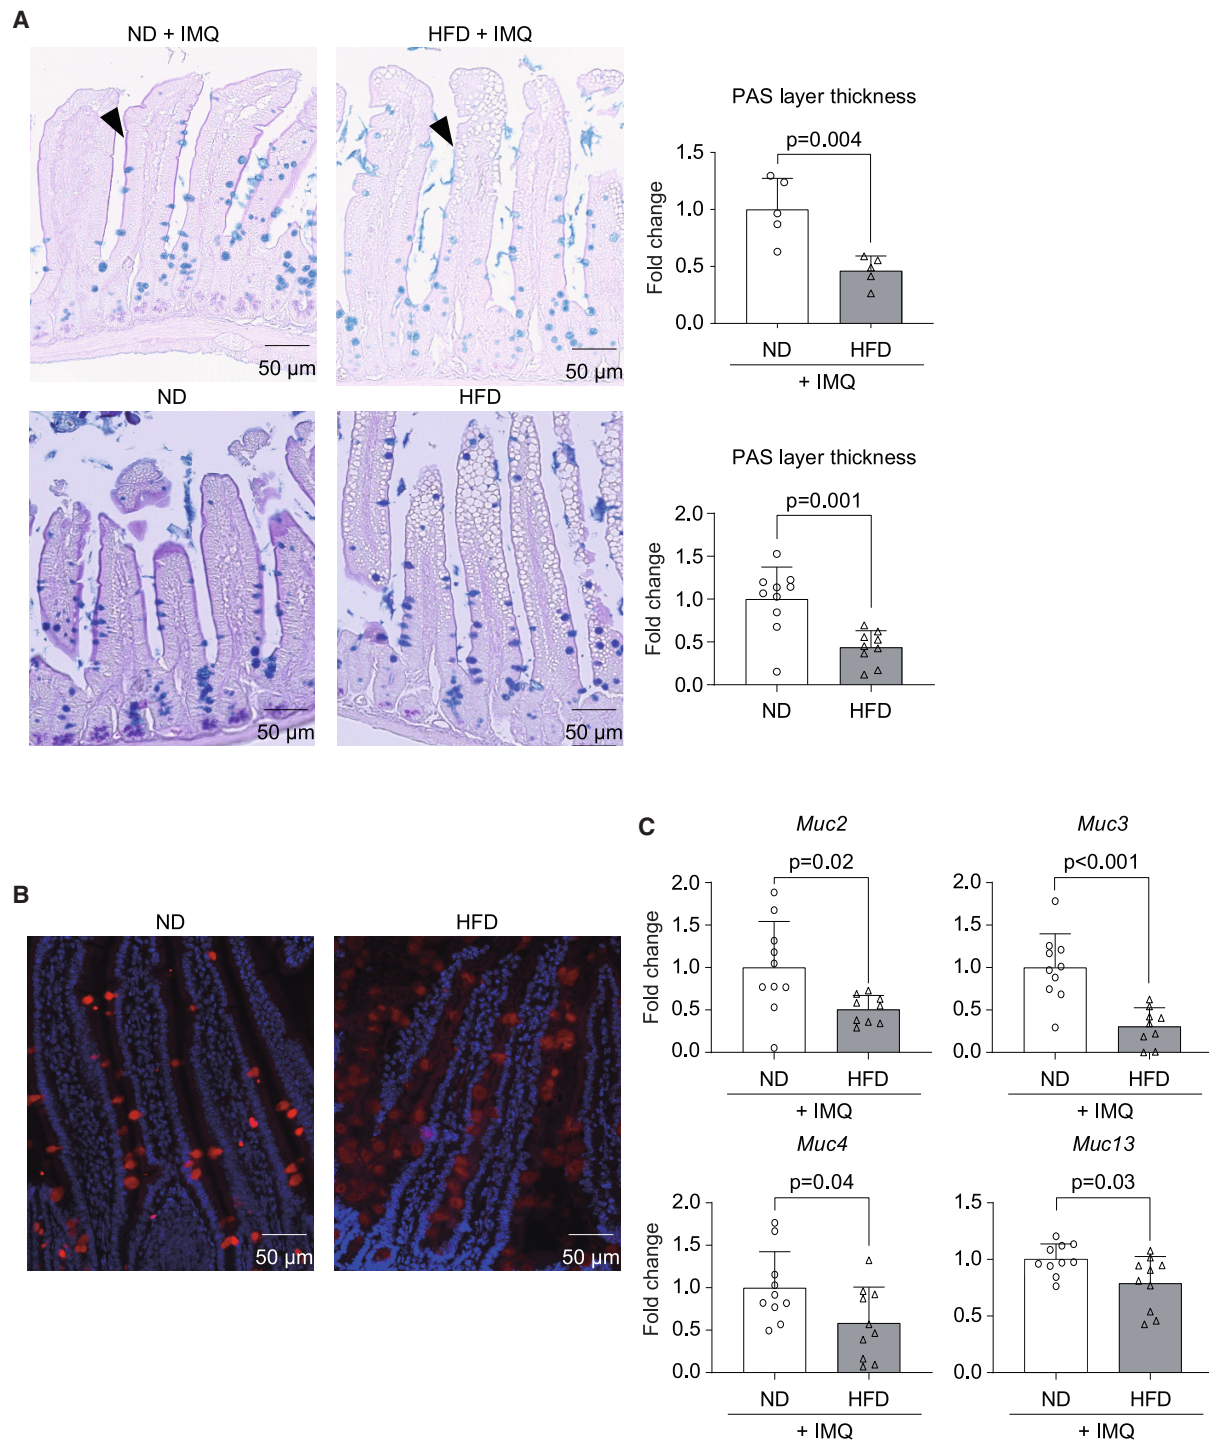

**Figure 3. HFD reduces mucin expression in the intestine**

C57BL/6 mice were fed an ND (3.3% fat) or HFD (35.7% fat) for 8 weeks and ear challenged with IMQ or without IMQ.

(A) Alcian blue periodic acid-Schiff (AB-PAS) staining of the ileum. Purple layers on the edge of the villus represents the mucin layer (black arrowhead), and mucin-producing cells are depicted by the blue-stained cells.

(A and B) Representative pictures and thickness of PAS layers are shown (A:  $n = 5$ ; B:  $n = 10$ ).

(B) Representative pictures of Mucin 2 staining in the ileum. Red: mucin 2; blue: DAPI.

(C) Quantitative real-time PCR for mucin mRNA expression in the first half of ileum ( $n = 10$ ). Bars in the graphs show the mean  $\pm$  SD.  $p$  values were calculated by unpaired Student's  $t$  test.

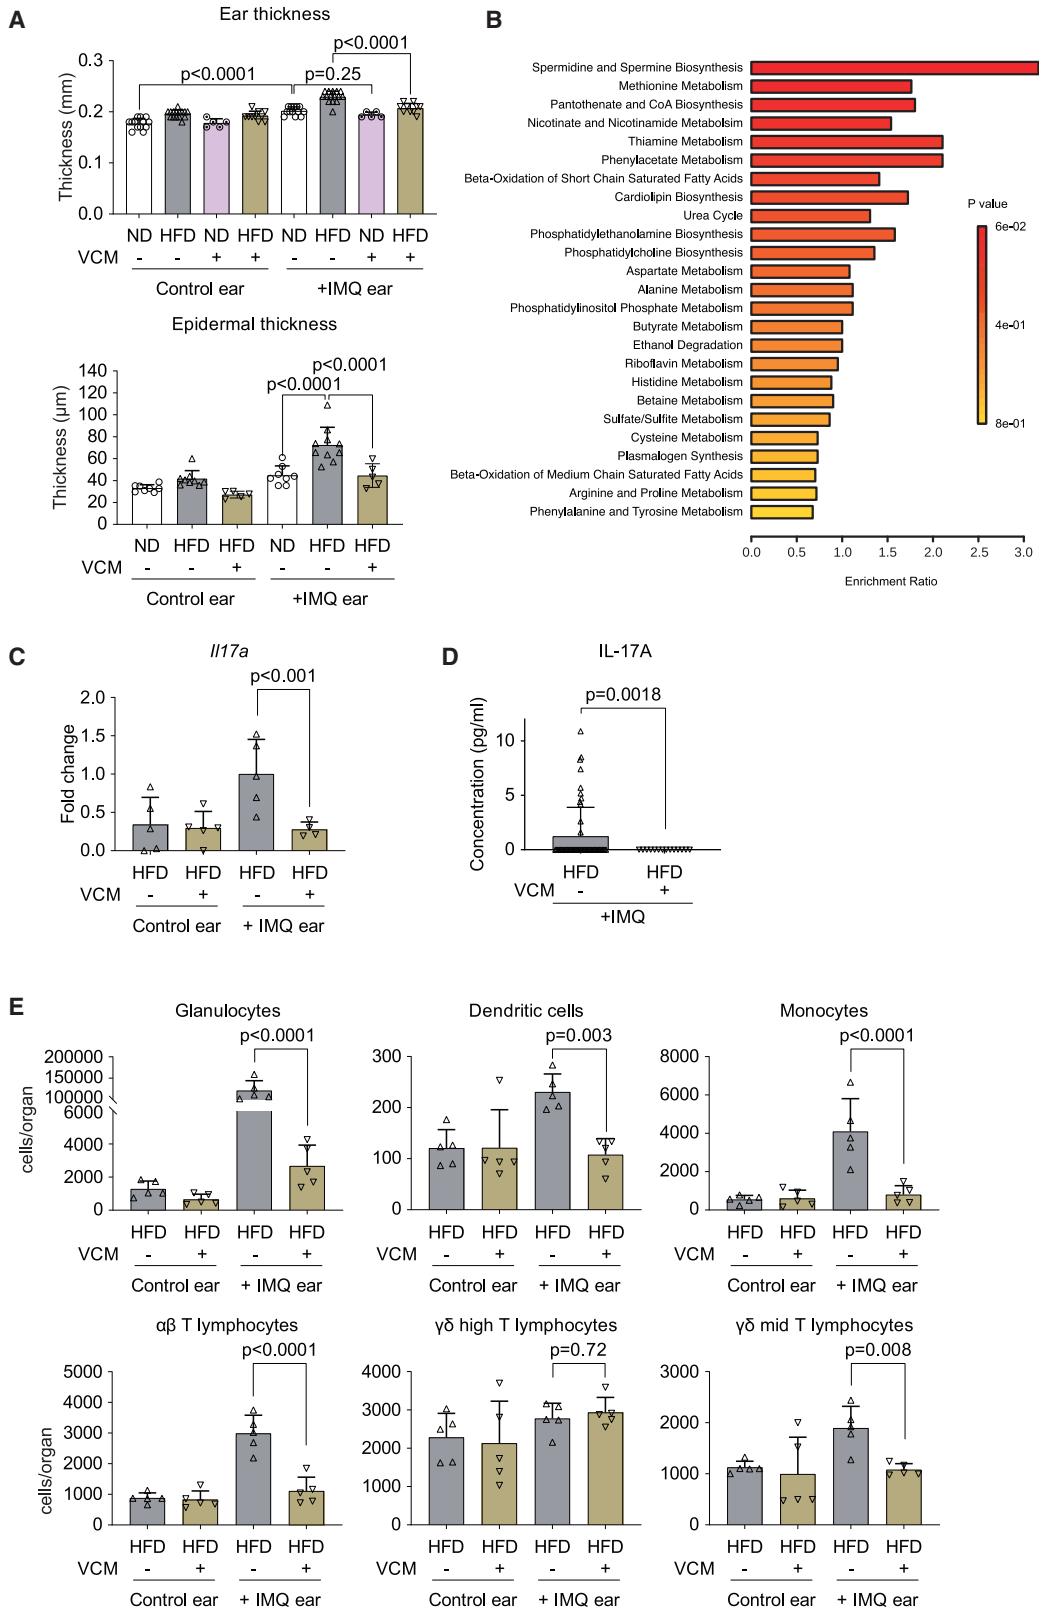

(legend on next page)

As gut microbiota influence host metabolism, we analyzed the possible metabolic perturbations induced by HFD. Therefore, we performed mass spectrometry analyses in the serum of ND mice, HFD mice, and HFD mice receiving VCM. Among all variables, phospholipid biosynthesis pathways related to known  $\gamma\delta$  T cell activators<sup>17</sup> (cardiolipin, phosphatidylethanolamine, phosphatidylcholine, phosphatidylinositol phosphate) were induced by HFD and suppressed after VCM treatment (Figure 4B). Therefore, we hypothesized that fatty acids prompt the translocation of antigen fragments from the intestinal lumen to systemic organs via blood vessels and lymphatic ducts in HFD mice.<sup>18</sup> In support of this hypothesis, inhibition of the translocation pathway by lomitapide partially rescued HFD-induced skin inflammation (Figures S8B and S8C). Moreover, induction of IL-17 expression in the affected skin (Figure 4C) and IL-17 level in the serum (Figure 4D) were significantly decreased in VCM-treated mice. Also, infiltration of myeloid cells and T cells, i.e.,  $\gamma\delta$  T lymphocytes, were reduced by VCM treatment (Figures 4E and S8D). These observations suggest that intestinal microbiota mediates enhanced psoriatic skin inflammation in response to HFD.

#### A. *muciniphila* plays a key role in intestinal homeostasis

To understand the link between the metabolic changes observed and the gut microbiota composition, we quantified the microbiome in different parts of the intestine by qPCR for 16S rDNA. While HFD strongly diminished the number of bacteria in the ileum, IMQ challenge selectively increased the bacterial load in the caecum of VCM-treated mice (Figure S9). Next, we performed 16S-based microbiome sequencing analysis to characterize the microbiome in intestines of IMQ-challenged mice treated with ND, HFD, and HFD receiving VCM treatment. The genus *A.*, in which *A. muciniphila* (Verrucomicrobiota phylum) is the only known species, mainly remains after VCM treatment (Figure 5A). Quantitative real-time PCR confirmed that the mice challenged with HFD and treated with VCM had large amounts of *A. muciniphila* in their ileum and caecum (Figure 5B).

To determine whether *A. muciniphila* was responsible for reduction of skin inflammation observed after VCM treatment, HFD mice were gavaged with  $2 \times 10^8$  colony-forming units (CFUs) of live or heat-killed *A. muciniphila* during the last 2 weeks of the experiment. First, we analyzed the composition of the gut microbiota following this treatment. According to the Shannon diversity index (Figure 5C) and the phylum and genus quantification (Figure 5D), both live and heat-killed *A. muciniphila* gavages restored the diversity of microbiome

in the ileum that was reduced by HFD. No such changes were observed in the colon (Figures S10A and S10B). *A. muciniphila* gavages did not rescue the weight gain or the glucose response induced by HFD but ameliorated the insulin tolerance (Figures S10C–S10E). Interestingly, live and heat-killed *A. muciniphila* restored *Muc4* mRNA expression in the ileum (Figure 5E), a transmembrane mucin expressed on the apical surfaces of epithelial cells that forms a glycocalyx layer to protect the gut barrier.<sup>19</sup> This was not the case for other mucins like Mucin-2, -3, and -13, which did not respond to the treatment (Figure 5E). In the colon, *Muc2* expression was restored after treatment with living *A. muciniphila* (Figures S10F and S10G). Gavage with live *A. muciniphila* also increased periodic acid-Schiff (PAS) layer and goblet cell density in the ileum, which was reduced by HFD (Figure 5F). This set of data suggests that administration of *A. muciniphila* modulates gut microbiota diversity and restores the gut barrier function disturbed by HFD.

#### A. *muciniphila* suppresses psoriatic skin inflammation by reducing systemic IL-17 levels

When assessing whether *A. muciniphila* treatment affects psoriatic disease, we found that both live and heat-killed *A. muciniphila* gavage attenuated HFD-enhanced ear swelling induced by IMQ (Figures 6A and 6B). Next, we tested if *A. muciniphila* inhibits systemic IL-17 induction by HFD. First, we checked the IL-17A production by T cells in spleen and MLNs after phorbol myristate acetate (PMA) and ionomycin stimulation *in vitro* (Figures 6C and 6D). No changes could be seen in MLN IL-17A<sup>+</sup>,  $\gamma\delta$  T cells, or IL-17A-producing  $\gamma\delta$  T cells after *in vitro* PMA stimulation (Figure 6D). However, HFD-induced upregulation of IL-17A by T cells in the spleen was suppressed by live or heat-killed *A. muciniphila* (Figures 6E and 6F).

To validate the effect of *A. muciniphila* on psoriatic inflammation, we applied IMQ treatment on IL-17A-GFP reporter mice fed with ND or HFD. Immune cells were isolated from the IMQ ear, and the IL-17A-producing  $\gamma\delta$  T cells were detected by flow cytometry. The frequencies of IL-17A-producing  $\gamma\delta$  T cells in the ear from HFD-fed mice were significantly reduced after *A. muciniphila* gavage (Figures 7A and 7B). Moreover, mRNA expression of *Il17a* in the ear was significantly reduced in *A. muciniphila* treatment groups (Figure 7C) along with a lower IL-17A level in the serum (Figure 7D). Immunohistology revealed alleviated epidermal hyperplasia and less IL-17A<sup>+</sup> immune cell infiltration in the IMQ-treated skin from HFD-fed mice treated with live *A. muciniphila* (Figure 7E). Overall, these data suggest that both heat-killed and live *A. muciniphila* treatments suppress psoriatic

#### Figure 4. Intestinal microbiome affects the exacerbation of psoriatic skin inflammation by HFD

C57BL/6 mice were fed an ND (3.3% fat) or HFD (35.7% fat) for 8 weeks and challenged with IMQ. 0.5 mg/dL vancomycin (VCM) was administrated as drinking water for the last 2 weeks.

(A) Ear thickness measured by caliper (n = 5–15). Epidermal thickness in H&E sections (n = 5–10).

(B) Pathway analysis of serum molecules measured by liquid chromatography mass spectrometry. Shown are pathways upregulated in the HFD group but decreased by VCM treatment (n = 10).

(C) Quantitative real-time PCR of *Il17a* expression in the skin (n = 5).

(D) Circulating IL-17 was measured in the serum by ELISA (HFD; n = 60, HFD + VCM; n = 15).

(E) Immune cell numbers in the total ear measured by flow cytometry (n = 5). Bars show the mean  $\pm$  SD. p values were calculated by analysis of variance followed by Sidak's post hoc tests for comparison of multiple groups or by unpaired Student's t test for comparison of two groups.



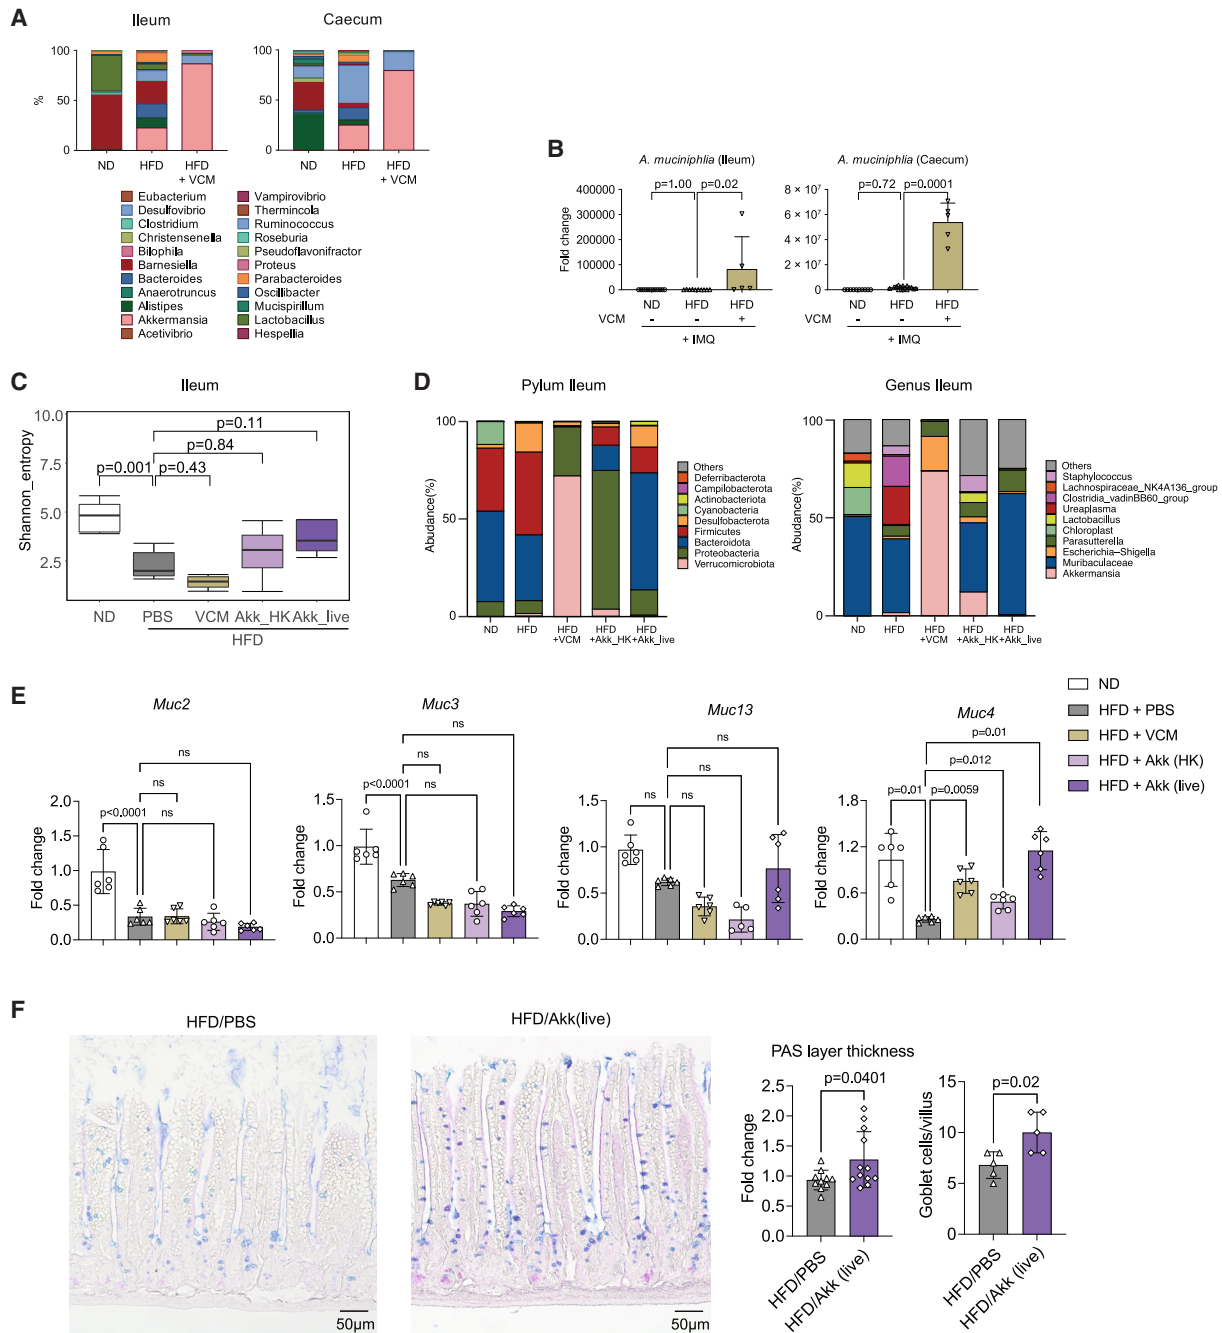

**Figure 5. *Akkermansia muciniphila* regulates the intestinal homeostasis**

(A and B) C57BL/6 mice were fed an ND (3.3% fat) or HFD (35.7% fat) for 8 weeks and challenged with IMQ. 0.5 mg/dL VCM was administered in drinking water for the last 2 weeks.

(A) Microbiome sequencing analysis of the bacterial 16S rDNA in the intestine (n = 5).

(B) Quantitative real-time PCR of 16S rDNA of *Akkermansia muciniphila* (Akk) in the intestine (n = 5–10).

(C–F) C57BL/6 mice were fed an ND (3.3% fat) or HFD (35.7% fat) for 8 weeks and challenged with IMQ. VCM in drinking water and live or heat-killed Akk oral gavage were given for the last 2 weeks.

(C) Shannon index values indicated gut microbiota diversity.

(D) Microbiome sequencing analysis of the bacterial 16S rDNA in the ileum at the level of phylum and genus (n = 5).

(E) Quantitative real-time PCR of mucins of the first half of ileum (n = 6).

(F) AB-PAS staining of the ileum, and quantification of the PAS layer and the goblet cells/villus (n = 5–12). Bars show the mean  $\pm$  SD. p values were calculated by analysis of variance followed by Sidak's post hoc tests for comparison of multiple groups or by unpaired Student's t test for comparison of two groups.

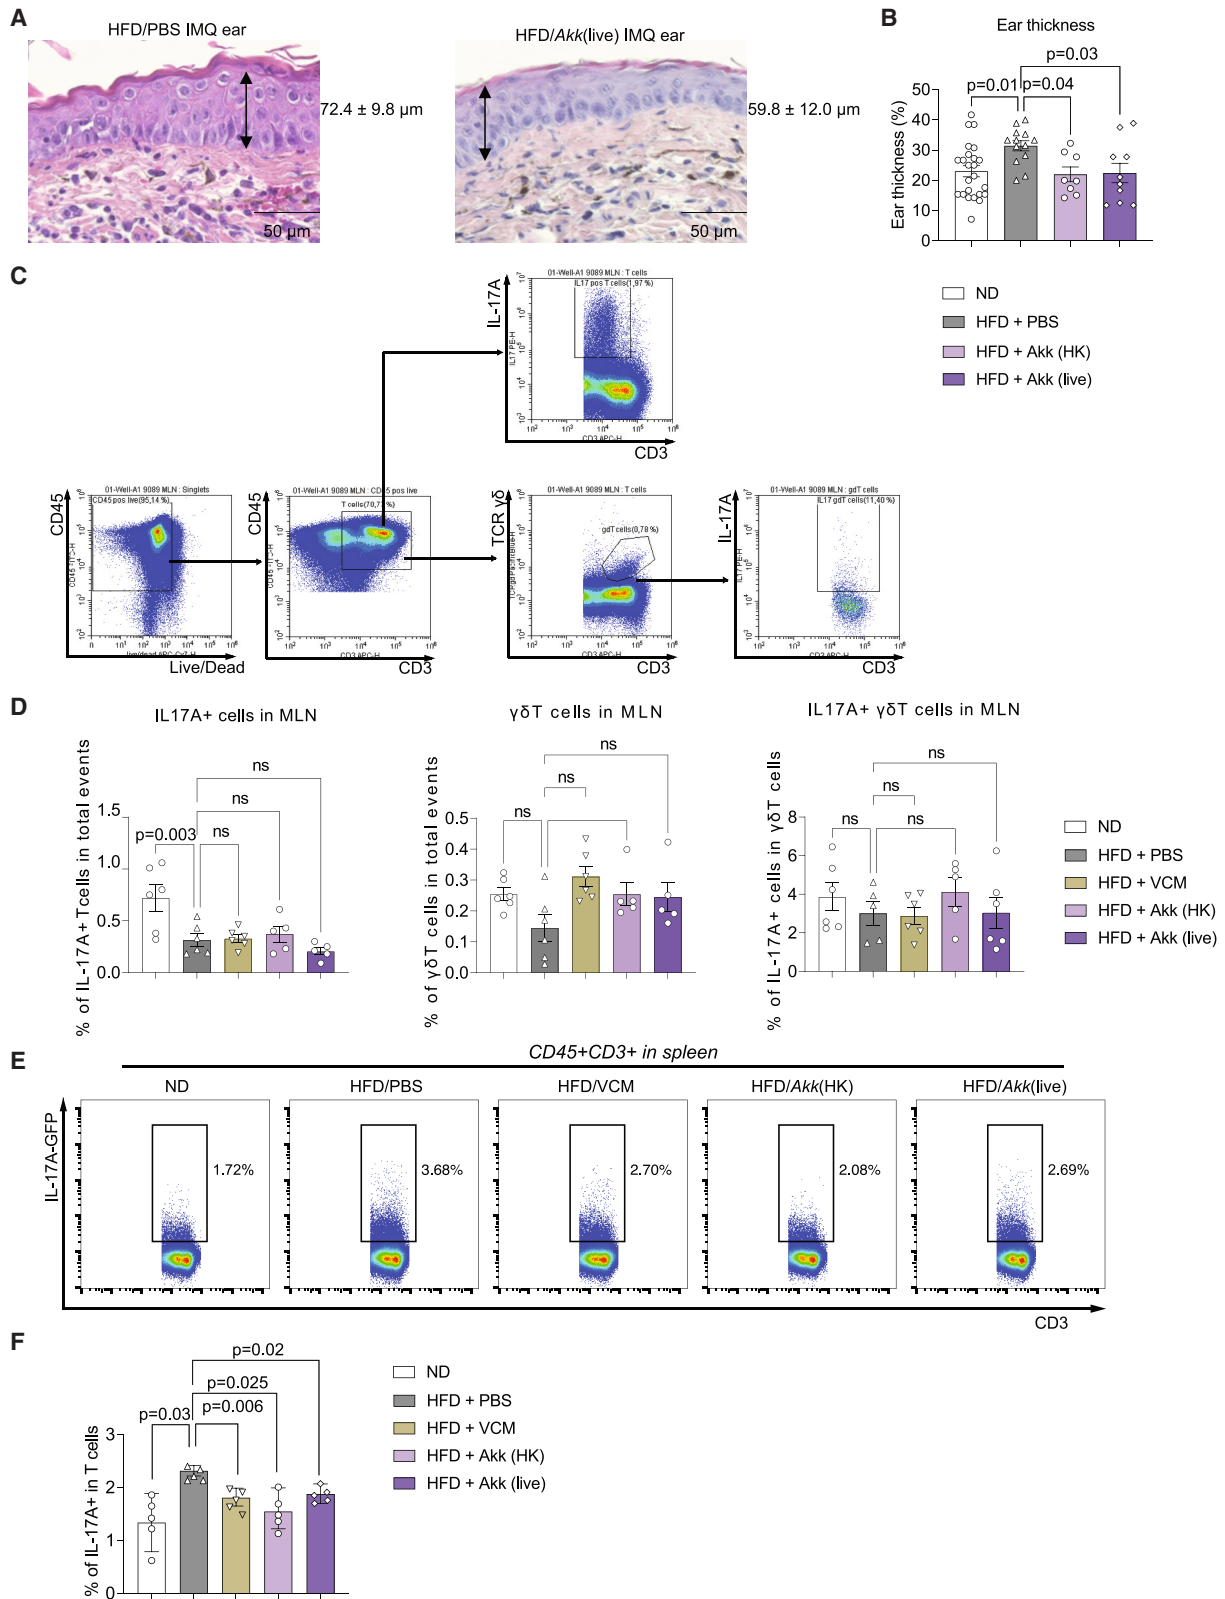

(legend on next page)

skin inflammation by reducing systemic IL-17 production and by decreasing infiltration of IL-17A-producing  $\gamma\delta$  T cells in the inflamed skin.

Altogether, our data suggest that both heat-killed and live *A. muciniphila* treatments suppress HFD-induced, IL-17-associated systemic inflammation via restoration of the gut barrier mucus dysfunction.

## DISCUSSION

Herein, we show that HFD exacerbates psoriatic disease via the intestinal microbiome. Mechanistically, the intestinal mucus barrier was impaired by HFD, which triggered a pro-inflammatory milieu and increased production of IL-17 by T cells, highlighting the systemic nature of psoriatic disease.

Exacerbation of psoriatic disease was based on dietary fat, but not sugar or protein, content. As reported previously, fat-based dietary metabolic stress increased the migration of myeloid cells and T cells, in particular IL-17-producing  $\gamma\delta$  T cells, in the challenged skin and thereby exacerbated disease.<sup>20</sup> Likewise, we found that several chemokines were upregulated during HFD, facilitating the migration of immune cells to the skin and supporting the concept of a systemic process that links the intestine with the skin. Of note, HFD cannot act locally on the skin but must have systemic effects to connect the intestine with the skin. Assessment of IL-17 expression upon HFD in several organ systems using an IL-17 reporter construct showed that IL-17-producing  $\gamma\delta$  T cells are induced in the spleen and thereby contribute to a systemic pro-inflammatory environment. This effect translated to elevated serum levels of IL-17 upon exposure to HFD.

Our data also showed that the effect of dietary metabolic stress on psoriatic skin inflammation is specific, as the expression of several classical inflammatory cytokines, such as TNF- $\alpha$ , IL-6, and G-GCF, remained unchanged, while IL-23, IL-17, and a subset of chemokines were upregulated. This finding supports the concept that microbial changes associated with dietary metabolic stress are triggering a pro-inflammatory, IL-17-based cytokine milieu. This concept is further supported by data showing that IL-17-producing  $\gamma\delta$  T cells expand upon pathogen challenge.<sup>21,22</sup> The observation that intestinal VCM treatment reduced the enhanced IL-17 activation and effectively inhibited psoriatic skin inflammation in metabolically challenged mice strongly supports the concept that the effect of HFD is based on intestinal microbial changes.

Unexpectedly, intestinal barrier function was not altered after HFD. This observation may be related to the time of exposure to dietary metabolic stress, as longer feeding of HFD has been shown to increase intestinal permeability,<sup>23,24</sup> while shorter

exposure had no effect.<sup>25</sup> However, profound changes in the mucus layer, mucus-producing cells, and mucin expression in the small intestine were found after HFD. Thus, exacerbation of skin inflammation and induction of IL-17-producing T cells by dietary metabolic stress may cause changes of the intestinal mucus barrier. Further experiments remain necessary to delineate the mucus barrier link to spleen IL-17 expression.

Our study point to a role of *A. muciniphila* in mitigating intestine-triggered inflammatory responses that exacerbate psoriatic disease. This bacterium is an intestinal commensal that resides in the mucus and is shown to be relevant for intact mucus layers. Thus, *A. muciniphila* could prevent age-related decline in thickness of the mucus layer and thereby attenuates inflammation.<sup>26</sup> Furthermore, *A. muciniphila* was shown to mediate the anti-inflammatory effect of fish oil<sup>27</sup> and inhibit the development of obesity and inflammation.<sup>28</sup> *A. muciniphila* has also been described as an intestinal bacterial species found in patients with psoriasis.<sup>4,29</sup> Treatment with VCM spared *A. muciniphila*, which becomes a dominant species in the gut, as previously reported,<sup>30</sup> and may therefore explain the immunomodulatory role of VCM in psoriasis. Hence, dysbiosis, rather than absence of certain microbes in the gut, may be the key driver of alterations in the hosts' immune response.<sup>31</sup> *A. muciniphila* encodes a wide repertoire of enzymes<sup>32</sup> that can degrade the mucin protein backbone and release sugars from the glycan chains. On the other hand, *A. muciniphila* was also found to stimulate mucin production, preserving the mucus thickness and the integrity of the gut barrier.<sup>33,34</sup> Supplementation with *A. muciniphila* reversed the HFD-induced exacerbation of psoriasis, indicating that *A. muciniphila* may block the detrimental effect of metabolic factors on the development of psoriasis. It has been reported that heat-killed *A. muciniphila* had even stronger effects on body weight gain and glucose intolerance in HFD-fed mice compared with live *A. muciniphila* because the effective outer membrane proteins can remain stable at high temperature and pasteurization increases the accessibility of the effector proteins to the host.<sup>28</sup> Nonetheless, in our study, *A. muciniphila* gavages did not rescue weight gain or glucose response but ameliorated insulin tolerance and psoriatic disease. Both heat-killed and live *A. muciniphila* had comparable effects on psoriatic skin inflammation.

In conclusion, these data indicate that HFD enhances psoriatic disease by changing gut microbiota and enhancing IL-17 production by  $\gamma\delta$  T cells in the spleen.

## Limitations of the study

We elucidated the key role of intestinal flora on the exacerbation of psoriasis caused by HFD. Probiotics such as *A. muciniphila*

### Figure 6. Akk suppresses psoriatic skin inflammation and systemic IL-17 induced by HFD

C57BL/6 mice were fed an ND (3.3% fat) or HFD (35.7% fat) for 8 weeks and challenged with IMQ. Oral gavages of live or heat-killed *Akk* were done for the last 2 weeks.

(A) Representative H&E staining of the IMQ-treated ears from HFD and HFD-live *Akk*-treated mice.

(B) Ear thickness was quantified in these different groups (n = 8–20).

(C and D) Comparison of the proportion of PMA/ionomycin-stimulated IL-17A<sup>+</sup> T cells,  $\gamma\delta$  T cells, and IL-17<sup>+</sup>  $\gamma\delta$  T cells in mLN from each group (n = 5–6).

(E and F) Flow cytometric analysis of the IL-17<sup>+</sup> T lymphocytes in the spleen. The boxed population shows the proportion of CD3 T cells (E). Proportion (%) of IL-17<sup>+</sup> T lymphocytes (F) (n = 5). Data are presented as the mean  $\pm$  SD. p values were calculated by analysis of variance followed by Sidak's post hoc tests for comparison of groups indicated.

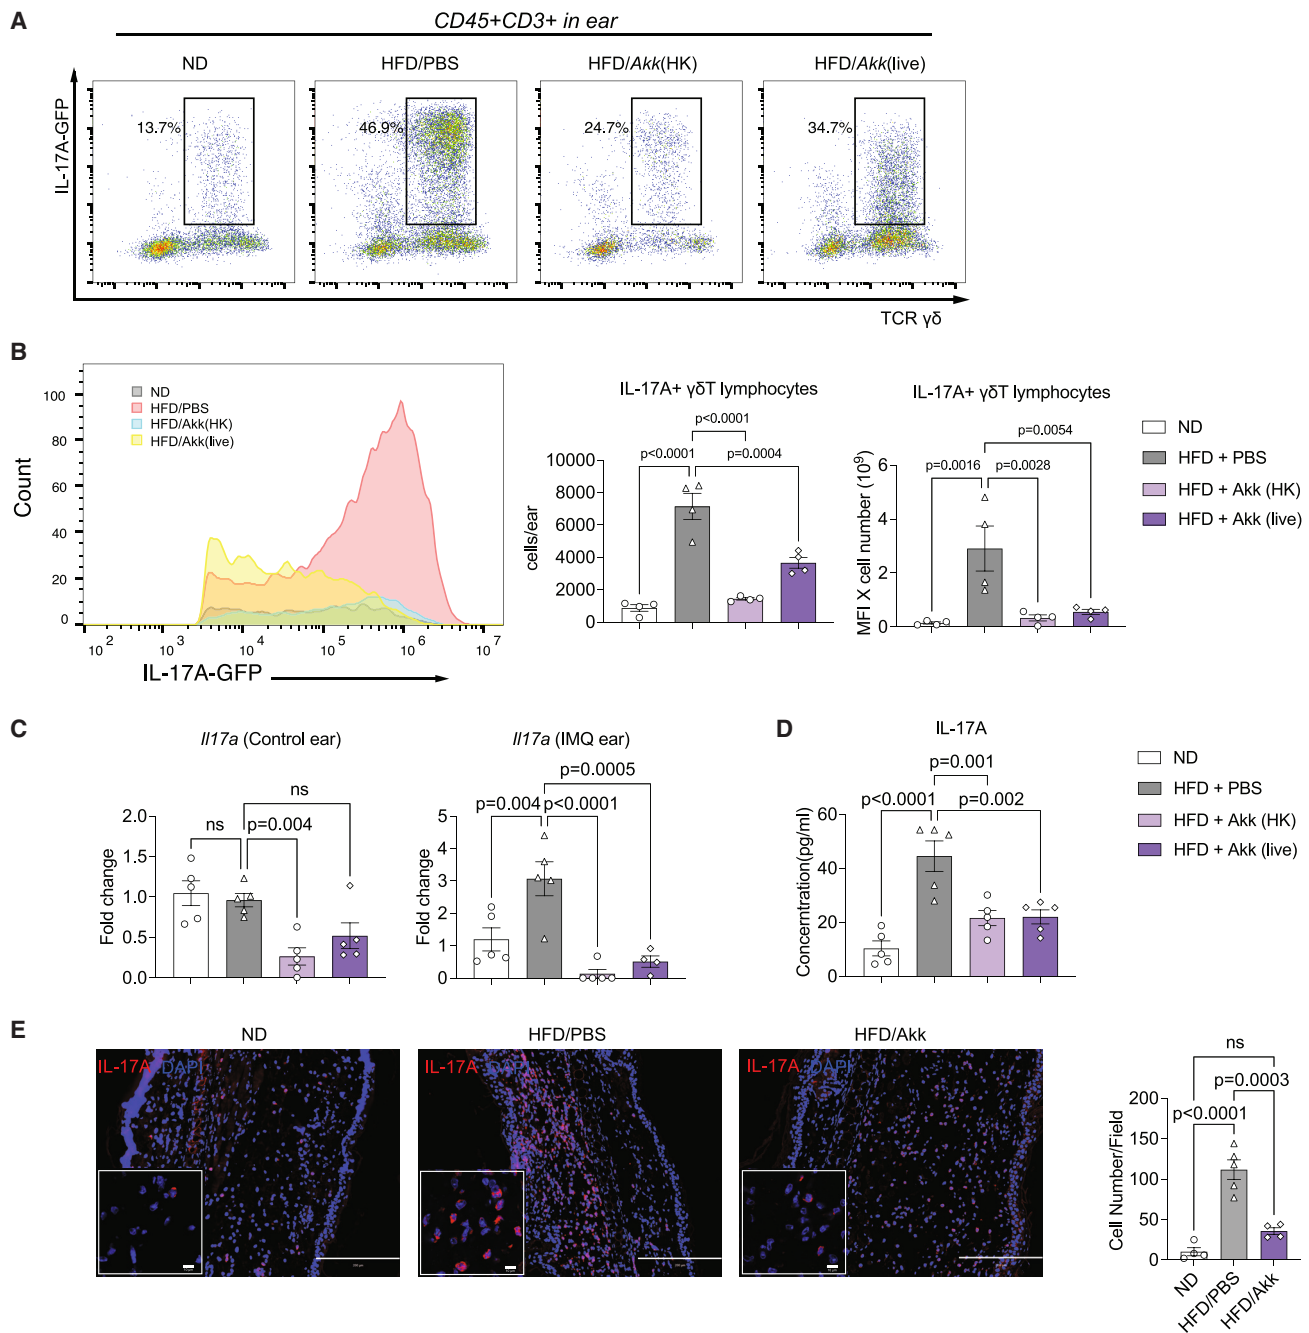

**Figure 7. Akk reduced the increased ear IL-17 levels from HFD**

(A) Representative dot plot showing IL-17<sup>+</sup> γδ T lymphocytes pregated on CD3<sup>+</sup> T cells in the whole IMQ-treated ear of ND- and HFD-fed mice with or without live or heat-killed Akk gavage.

(B) Flow cytometric analysis of the IL-17<sup>+</sup> γδ T lymphocytes in the IMQ-treated ear skin. Histogram of IL-17A-GFP population, collective MFI, and number of IL-17<sup>+</sup> γδ T lymphocytes in the whole IMQ-treated ear skin (n = 4–6).

(C) Fold induction of *Il17a* mRNA in the ear skin, as analyzed by qRT-PCR (n = 5).

(D) ELISA quantification of IL-17A concentration (pg/mL) in serum from the different groups (n = 5).

(E) Immunofluorescence for IL-17A (red) and DNA (DAPI, blue) and quantification of IL-17 cells/field in the IMQ-treated ear with or without HFD/Akk (n = 4–5). Data are presented as the mean ± SD. p values were calculated by analysis of variance followed by Sidak's post hoc tests for comparison of groups indicated.

could help to maintain or restore the intestinal barrier. However, improving the intestinal microenvironment with probiotics still requires further investigations, notably in the analysis of the metabolic links downstream of lipid metabolism. For instance, metabolic intermediates or metabolic molecular modifications are specifically altered by probiotics, which would need to be better characterized to optimize future clinical treatments. In addition, although our study showed that HFD alters IL-17 production by  $\gamma\delta$  T cells in the spleen, the detailed mechanisms need to be further studied.

## STAR★METHODS

Detailed methods are provided in the online version of this paper and include the following:

- KEY RESOURCES TABLE
- RESOURCE AVAILABILITY
  - Lead contact
  - Materials availability
  - Data and code availability
- EXPERIMENTAL MODEL AND STUDY PARTICIPANT DETAILS
  - Animal studies
- METHOD DETAILS
  - Flow cytometry
  - Ear sample preparation
  - Blood sample preparation
  - Spleen, lymph nodes and Peyer's patches sample preparation
  - Intestinal epithelial fraction sample preparation
  - Lamina propria fraction sample preparation
  - Colon sample preparation
  - Sample staining for analysis with flow cytometer
  - Adoptive transfer model of IMQ dermatitis mice
  - RNA extraction and cDNA synthesis
  - Real-time PCR
  - Enzyme-linked immunosorbent assay (ELISA)
  - Histology
  - Immunofluorescence
  - Microscopy
  - Intestinal permeability assay
  - Stool DNA isolation
  - 16s ribosomal RNA sequence analysis
  - $\gamma\delta$  T cell sorting
  - TCR repertoire analysis
  - Liquid chromatography - Mass spectrometry (LC/MS)
- QUANTIFICATION AND STATISTICAL ANALYSIS

## SUPPLEMENTAL INFORMATION

Supplemental information can be found online at <https://doi.org/10.1016/j.celrep.2023.112713>.

## ACKNOWLEDGMENTS

We thank Christine Zech and Barbara Happich for great technical assistance. The authors thank Dr. Wolfgang Baum for expertise in mice experiments. We thank Uwe Appelt and Markus Mroz of the Core Unit Cell Sorting and Immuno-

monitoring facility for their technical support in flow cytometry and for cell sorting. This study was supported by the German Research Foundation (BO-3811/5-1, BO-3811/6-1, and INST 90/1048-1 FUGG), the Collaborative Research Center (CRC) 1181 project A01; the SPP  $\mu$ Bone; FOR 2886 Pandora TPO A2 and A1; FOR2799 to T.H.W. (project number 395236335); the Fritz Thyssen Foundation; the Interdisciplinary Center for Clinical Research (IZKF) grant A77; and the European Research Council (ERC) Synergy Grant 4D Nanoscope.

## AUTHOR CONTRIBUTIONS

K.S., R.S., D.E., and A.B. designed the study, performed the experiments, interpreted the results, and wrote the manuscript. A.M.H. designed and performed the experiments and interpreted the data. N.L. and R.V.T. performed experiments and corrected data. K.S., R.S., D.E., and R.V.T. performed bioinformatics analysis and interpreted the data. S.W. and D.S. provided expertise in microbiome and bacteria analyses. Y.T., G.S., and A.B. acquired funding, designed the study and experiments, and wrote the manuscript. All authors read and commented on the manuscript.

## DECLARATION OF INTERESTS

The authors declare no competing interests.

## INCLUSION AND DIVERSITY

We support inclusive, diverse, and equitable conduct of research.

Received: April 8, 2021

Revised: May 15, 2023

Accepted: June 13, 2023

Published: July 7, 2023

## REFERENCES

1. Boehncke, W.H., and Schön, M.P. (2015). Psoriasis. *Lancet* 386, 983–994. [https://doi.org/10.1016/S0140-6736\(14\)61909-7](https://doi.org/10.1016/S0140-6736(14)61909-7).
2. Jensen, P., and Skov, L. (2016). Psoriasis and Obesity. *Dermatology* 232, 633–639. <https://doi.org/10.1159/000455840>.
3. Alotaibi, H.A. (2018). Effects of Weight Loss on Psoriasis: A Review of Clinical Trials. *Cureus* 10, e3491. <https://doi.org/10.7759/cureus.3491>.
4. Codoñer, F.M., Ramírez-Bosca, A., Climent, E., Carrión-Gutierrez, M., Guerrero, M., Pérez-Orquín, J.M., Horga de la Parte, J., Genovés, S., Ramón, D., Navarro-López, V., and Chenoll, E. (2018). Gut microbial composition in patients with psoriasis. *Sci. Rep.* 8, 3812. <https://doi.org/10.1038/s41598-018-22125-y>.
5. Scher, J.U., Ubeda, C., Artacho, A., Attur, M., Isaac, S., Reddy, S.M., Marmon, S., Neimann, A., Brusca, S., Patel, T., et al. (2015). Decreased bacterial diversity characterizes the altered gut microbiota in patients with psoriatic arthritis, resembling dysbiosis in inflammatory bowel disease. *Arthritis Rheumatol.* 67, 128–139. <https://doi.org/10.1002/art.38892>.
6. Bäckhed, F., Ding, H., Wang, T., Hooper, L.V., Koh, G.Y., Nagy, A., Semenkovich, C.F., and Gordon, J.I. (2004). The gut microbiota as an environmental factor that regulates fat storage. *Proc. Natl. Acad. Sci. USA* 101, 15718–15723. <https://doi.org/10.1073/pnas.0407076101>.
7. Turnbaugh, P.J., Ley, R.E., Mahowald, M.A., Magrini, V., Mardis, E.R., and Gordon, J.I. (2006). An obesity-associated gut microbiome with increased capacity for energy harvest. *Nature* 444, 1027–1031. <https://doi.org/10.1038/nature05414>.
8. Ley, R.E., Turnbaugh, P.J., Klein, S., and Gordon, J.I. (2006). Microbial ecology: human gut microbes associated with obesity. *Nature* 444, 1022–1023. <https://doi.org/10.1038/4441022a>.
9. Gregory, J.C., Buffa, J.A., Org, E., Wang, Z., Levison, B.S., Zhu, W., Wagner, M.A., Bennett, B.J., Li, L., DiDonato, J.A., et al. (2015). Transmission of

- atherosclerosis susceptibility with gut microbial transplantation. *J. Biol. Chem.* 290, 5647–5660. <https://doi.org/10.1074/jbc.M114.618249>.
10. Karlsson, F.H., Tremaroli, V., Nookaew, I., Bergström, G., Behre, C.J., Fagerberg, B., Nielsen, J., and Bäckhed, F. (2013). Gut metagenome in European women with normal, impaired and diabetic glucose control. *Nature* 498, 99–103. <https://doi.org/10.1038/nature12198>.
  11. Derrien, M., Vaughan, E.E., Plugge, C.M., and de Vos, W.M. (2004). Akkermansia muciniphila gen. nov., sp. nov., a human intestinal mucin-degrading bacterium. *Int. J. Syst. Evol. Microbiol.* 54, 1469–1476. <https://doi.org/10.1099/ijs.0.02873-0>.
  12. Derrien, M., Collado, M.C., Ben-Amor, K., Salminen, S., and de Vos, W.M. (2008). The Mucin degrader Akkermansia muciniphila is an abundant resident of the human intestinal tract. *Appl. Environ. Microbiol.* 74, 1646–1648. <https://doi.org/10.1128/AEM.01226-07>.
  13. Derrien, M., Van Baarlen, P., Hooiveld, G., Norin, E., Müller, M., and de Vos, W.M. (2011). Modulation of mucosal immune response, tolerance, and proliferation in mice colonized by the mucin-degrader Akkermansia muciniphila. *Front. Microbiol.* 2, 166. <https://doi.org/10.3389/fmicb.2011.00166>.
  14. Li, J., Lin, S., Vanhoutte, P.M., Woo, C.W., and Xu, A. (2016). Akkermansia muciniphila protects against atherosclerosis by preventing metabolic endotoxemia-induced inflammation in Apoe<sup>-/-</sup> mice. *Circulation* 133, 2434–2446. <https://doi.org/10.1161/CIRCULATIONAHA.115.019645>.
  15. Shibata, K., Yamada, H., Hara, H., Kishihara, K., and Yoshikai, Y. (2007). Resident V $\delta$ 1+  $\gamma\delta$  T cells control early infiltration of neutrophils after Escherichia coli infection via IL-17 production. *J. Immunol.* 178, 4466–4472. <https://doi.org/10.4049/jimmunol.178.7.4466>.
  16. Sferri, R., Pompili, S., Cappariello, A., Gaudio, E., Latella, G., and Vetusch, A. (2021). Prolonged chronic consumption of a high fat with sucrose diet alters the morphology of the small intestine. *Int. J. Mol. Sci.* 22, 7280. <https://doi.org/10.3390/ijms22147280>.
  17. Reijneveld, J.F., Ocampo, T.A., Shahine, A., Gully, B.S., Vantourout, P., Hayday, A.C., Rossjohn, J., Moody, D.B., and Van Rhijn, I. (2020). Human  $\gamma\delta$  T cells recognize CD1b by two distinct mechanisms. *Proc. Natl. Acad. Sci. USA* 117, 22944–22952. <https://doi.org/10.1073/pnas.2010545117>.
  18. Wang, Y., Ghoshal, S., Ward, M., de Villiers, W., Woodward, J., and Eckhardt, E. (2009). Chylomicrons promote intestinal absorption and systemic dissemination of dietary antigen (ovalbumin) in mice. *PLoS One* 4, e8442. <https://doi.org/10.1371/journal.pone.0008442>.
  19. Grondin, J.A., Kwon, Y.H., Far, P.M., Haq, S., and Khan, W.I. (2020). Mucins in intestinal mucosal defense and inflammation: learning from clinical and experimental studies. *Front. Immunol.* 11, 2054. <https://doi.org/10.3389/fimmu.2020.02054>.
  20. Nakamizo, S., Honda, T., Adachi, A., Nagatake, T., Kunisawa, J., Kitoh, A., Otsuka, A., Dainichi, T., Nomura, T., Ginhoux, F., et al. (2017). High fat diet exacerbates murine psoriatic dermatitis by increasing the number of IL-17-producing  $\gamma\delta$  T cells. *Sci. Rep.* 7, 14076. <https://doi.org/10.1038/s41598-017-14292-1>.
  21. Martin, B., Hirota, K., Cua, D.J., Stockinger, B., and Veldhoen, M. (2009). Interleukin-17-producing gammadelta T cells selectively expand in response to pathogen products and environmental signals. *Immunity* 31, 321–330. <https://doi.org/10.1016/j.immuni.2009.06.020>.
  22. Zákostelská, Z., Málková, J., Klimešová, K., Rossmann, P., Hornová, M., Novosádová, I., Stehliková, Z., Kostovčík, M., Hudcovic, T., Štěpánková, R., et al. (2016). Intestinal Microbiota Promotes Psoriasis-Like Skin Inflammation by Enhancing Th17 Response. *PLoS One* 11, e0159539. <https://doi.org/10.1371/journal.pone.0159539>.
  23. Stenman, L.K., Holma, R., and Korpela, R. (2012). High-fat-induced intestinal permeability dysfunction associated with altered fecal bile acids. *World J. Gastroenterol.* 18, 923–929. <https://doi.org/10.3748/wjg.v18.i9.923>.
  24. Cani, P.D., Bibiloni, R., Knauf, C., Waget, A., Neyrinck, A.M., Delzenne, N.M., and Burcelin, R. (2008). Changes in gut microbiota control metabolic endotoxemia-induced inflammation in high-fat diet-induced obesity and diabetes in mice. *Diabetes* 57, 1470–1481. <https://doi.org/10.2337/db07-1403>.
  25. Kless, C., Müller, V.M., Schüppel, V.L., Lichtenegger, M., Rychlik, M., Daniel, H., Klingenspor, M., and Haller, D. (2015). Diet-induced obesity causes metabolic impairment independent of alterations in gut barrier integrity. *Mol. Nutr. Food Res.* 59, 968–978. <https://doi.org/10.1002/mnfr.201400840>.
  26. van der Lugt, B., van Beek, A.A., Aalvink, S., Meijer, B., Sovran, B., Vermeij, W.P., Brandt, R.M.C., de Vos, W.M., Savelkoul, H.F.J., Steegenga, W.T., and Belzer, C. (2019). Akkermansia muciniphila ameliorates the age-related decline in colonic mucus thickness and attenuates immune activation in accelerated aging Ercc1 (-/Delta7) mice. *Immun. Ageing* 16, 6. <https://doi.org/10.1186/s12979-019-0145-z>.
  27. Caesar, R., Tremaroli, V., Kovatcheva-Datchary, P., Cani, P.D., and Bäckhed, F. (2015). Crosstalk between Gut Microbiota and Dietary Lipids Aggravates WAT Inflammation through TLR Signaling. *Cell Metabol.* 22, 658–668. <https://doi.org/10.1016/j.cmet.2015.07.026>.
  28. Plovier, H., Everard, A., Druart, C., Depommier, C., Van Hul, M., Geurts, L., Chilloux, J., Ottman, N., Duparc, T., Lichtenstein, L., et al. (2017). A purified membrane protein from Akkermansia muciniphila or the pasteurized bacterium improves metabolism in obese and diabetic mice. *Nat. Med.* 23, 107–113. <https://doi.org/10.1038/nm.4236>.
  29. Tan, L., Zhao, S., Zhu, W., Wu, L., Li, J., Shen, M., Lei, L., Chen, X., and Peng, C. (2018). The Akkermansia muciniphila is a gut microbiota signature in psoriasis. *Exp. Dermatol.* 27, 144–149. <https://doi.org/10.1111/exd.13463>.
  30. Hansen, C.H.F., Krych, L., Nielsen, D.S., Vogensen, F.K., Hansen, L.H., Sørensen, S.J., Buschard, K., and Hansen, A.K. (2012). Early life treatment with vancomycin propagates Akkermansia muciniphila and reduces diabetes incidence in the NOD mouse. *Diabetologia* 55, 2285–2294. <https://doi.org/10.1007/s00125-012-2564-7>.
  31. Reading, N.C., and Kasper, D.L. (2011). The starting lineup: key microbial players in intestinal immunity and homeostasis. *Front. Microbiol.* 2, 148. <https://doi.org/10.3389/fmicb.2011.00148>.
  32. Puertollano, E., Kolida, S., and Yaqoob, P. (2014). Biological significance of short-chain fatty acid metabolism by the intestinal microbiome. *Curr. Opin. Clin. Nutr. Metab. Care* 17, 139–144. <https://doi.org/10.1097/MCO.000000000000025>.
  33. Everard, A., Belzer, C., Geurts, L., Ouwerkerk, J.P., Druart, C., Bindels, L.B., Guiot, Y., Derrien, M., Muccioli, G.G., Delzenne, N.M., et al. (2013). Cross-talk between Akkermansia muciniphila and intestinal epithelium controls diet-induced obesity. *Proc. Natl. Acad. Sci. USA* 110, 9066–9071. <https://doi.org/10.1073/pnas.1219451110>.
  34. Shin, N.-R., Lee, J.-C., Lee, H.-Y., Kim, M.-S., Whon, T.W., Lee, M.-S., and Bae, J.-W. (2014). An increase in the Akkermansia spp. population induced by metformin treatment improves glucose homeostasis in diet-induced obese mice. *Gut* 63, 727–735. <https://doi.org/10.1136/gutjnl-2012-303839>.
  35. Heilig, J.S., and Tonegawa, S. (1986). Diversity of murine gamma genes and expression in fetal and adult T lymphocytes. *Nature* 322, 836–840. <https://doi.org/10.1038/322836a0>.

## STAR★METHODS

### KEY RESOURCES TABLE

| REAGENT or RESOURCE                                  | SOURCE         | IDENTIFIER                      |
|------------------------------------------------------|----------------|---------------------------------|
| <b>Antibodies</b>                                    |                |                                 |
| Anti-mouse Ly6G-APC (clone 1A8)                      | BD Biosciences | Cat#560599; RRID:AB_1727560     |
| Anti-mouse CD45-eFluor780 (clone 30-F11)             | eBioscience    | Cat#47-0451-82; RRID:AB_1548781 |
| Anti-mouse Ly6C-BV421 (clone AL-21)                  | BD Biosciences | Cat#562727; RRID:AB_2737748     |
| Anti-mouse CD11c-PE (clone N418)                     | Biolegend      | Cat#117308; RRID:AB_313777      |
| Anti-mouse CD11b-PE/Cy7 (clone M1/70)                | eBioscience    | Cat#25-0112-81; RRID:AB_469588  |
| Anti-mouse CD4-PerCP (clone GK1.5)                   | Biolegend      | Cat#100431; RRID:AB_893329      |
| Anti-mouse CD3ε-APC (clone 145-2C11)                 | Biolegend      | Cat#100312; RRID:AB_312677      |
| Anti-mouse CD45-alexafuor488 (clone 30-F11)          | Biolegend      | Cat#103128; RRID:AB_493715      |
| Anti-mouse CD8a-APC/Cy7 (clone 53–6.7)               | BD Biosciences | Cat#557654; RRID:AB_396769      |
| Anti-mouse TCRγ/δ-BV421 (clone GL3)                  | Biolegend      | Cat#118119; RRID:AB_10896753    |
| Anti-mouse TCRβ-BV510 (clone H57-597)                | Biolegend      | Cat#109233; RRID:AB_2562349     |
| Anti-mouse CD19-PE (clone 1D3)                       | BD Biosciences | Cat#553786; RRID:AB_395050      |
| Anti-mouse TCR Vγ1.1/Cr4-PerCP/Cy5.5 (clone 2.11)    | Biolegend      | Cat#141111; RRID:AB_2750516     |
| Anti-mouse CD11b-APC/Cy7 (clone M1/70)               | Biolegend      | Cat#101225; RRID:AB_830641      |
| Anti-mouse TCR Vγ2-PE/Cy7 (clone UC3-10A6)           | ThermoFisher   | Cat#25-5828-82; RRID:AB_2573474 |
| Anti-mouse TCR Vγ1.1/Cr4-APC (clone 2.11)            | Biolegend      | Cat#141107; RRID:AB_10897806    |
| Anti-mouse CD19-APC/Cy7 (clone 1D3)                  | BD Biosciences | Cat#557655; RRID:AB_396770      |
| Anti-mouse CD3-PE (clone 17A2)                       | Biolegend      | Cat#100205; RRID:AB_312662      |
| TruStain FcX™ (anti-mouse CD16/32)                   | Biolegend      | Cat#101320; RRID:AB_1574975     |
| <b>Antibody</b>                                      |                |                                 |
| Anti-CD28 (clone CD28.2)                             | eBioscience    | Cat#16-0281-82                  |
| Anti-MUC2                                            | Novus          | Cat#NBP1-31231                  |
| Anti-IL-17A                                          | abcam          | Cat#ab79056                     |
| <b>Bacterial and virus strains</b>                   |                |                                 |
| <i>Akkermansia muciniphila</i>                       | This study     | N/A                             |
| <b>Chemicals, peptides, and recombinant proteins</b> |                |                                 |
| Collagenase II                                       | Merck          | Cat#C 2-22                      |
| HBSS                                                 | Gibco          | Cat#14025050                    |
| DNase I                                              | Sigma-Aldrich  | Cat#10104159001                 |
| HEPES                                                | Merck          | Cat#L1613                       |
| DTT                                                  | Roth           | Cat#6908.1                      |
| PEQGOLD RNAPURE                                      | VWR            | Cat#732-3312                    |
| AccuGENE 0.5 M EDTA Solution                         | Lonza          | Cat#51201                       |
| Fetal calf serum                                     | Gibco          | Cat#26400044                    |
| VECTASHIELD with DAPI                                | Vector labs    | Cat#H-1200                      |
| DPBS                                                 | Gibco          | Cat#14040141                    |
| Imiquimod cream                                      | MEDA           | N/A                             |
| vancomycin                                           | Merck          | Cat#1404-93-9                   |
| <b>Critical commercial assays</b>                    |                |                                 |
| TCRγ/δ+ T cell Isolation Kit, mouse                  | Miltenyi       | Cat#130-092-125                 |
| QIAamp Fast DNA Stool Mini Kit                       | Qiagen         | Cat# 51604                      |

(Continued on next page)

| <b>Continued</b>                                                    |                        |                                                                                                                                                                                                                       |
|---------------------------------------------------------------------|------------------------|-----------------------------------------------------------------------------------------------------------------------------------------------------------------------------------------------------------------------|
| REAGENT or RESOURCE                                                 | SOURCE                 | IDENTIFIER                                                                                                                                                                                                            |
| IL-17A (homodimer) Mouse Uncoated ELISA Kit                         | Invitrogen             | Cat#88-7371-22                                                                                                                                                                                                        |
| High-Capacity cDNA Reverse Transcription Kit                        | LifeTech               | Cat#4368813                                                                                                                                                                                                           |
| SYBR qPCR Master Mix Kit                                            | Applied biosystems     | Cat#4472920                                                                                                                                                                                                           |
| RNeasy Mini Kit                                                     | Qiagen                 | Cat#74104                                                                                                                                                                                                             |
| <b>Deposited data</b>                                               |                        |                                                                                                                                                                                                                       |
| The Liquid Chromatography - Mass Spectrometry metabolomics datasets | This paper             | <a href="https://www.ebi.ac.uk/metabolights/MTBLS7964">https://www.ebi.ac.uk/metabolights/MTBLS7964</a>                                                                                                               |
| 16S rRNA sequence datasets                                          | This paper             | BioProject: <a href="https://www.ncbi.nlm.nih.gov/bioproject/PRJNA979156">PRJNA979156</a> ; <a href="https://www.ncbi.nlm.nih.gov/bioproject/PRJNA979156">https://www.ncbi.nlm.nih.gov/bioproject/PRJNA979156</a>     |
| <b>Experimental models: Organisms/strains</b>                       |                        |                                                                                                                                                                                                                       |
| C57BL/6NRj                                                          | Janvier labs           | N/A                                                                                                                                                                                                                   |
| C57BL/6-Il17a <sup>tm1Bcgen</sup> /J                                | The Jackson Laboratory | RRID:IMSR_JAX:018472                                                                                                                                                                                                  |
| <b>Oligonucleotides</b>                                             |                        |                                                                                                                                                                                                                       |
| Primers for qPCR are listed in <a href="#">Table S3</a>             | N/A                    | N/A                                                                                                                                                                                                                   |
| <b>Software and algorithms</b>                                      |                        |                                                                                                                                                                                                                       |
| Graphpad Prism 9                                                    | GraphPad Software      | <a href="https://www.graphpad.com/">https://www.graphpad.com/</a>                                                                                                                                                     |
| ZEN 2012 SP1 v8.1.0484                                              | Zeiss                  | <a href="https://www.zeiss.com.cn/microscopy/products/microscopesoftware/zen.html">https://www.zeiss.com.cn/microscopy/products/microscopesoftware/zen.html</a>                                                       |
| Biorender                                                           | Biorender              | <a href="https://www.biorender.com">https://www.biorender.com</a>                                                                                                                                                     |
| Flowjo                                                              | Flowjo                 | <a href="https://www.flowjo.com/">https://www.flowjo.com/</a>                                                                                                                                                         |
| QuantStudio Software v1.3                                           | Thermo Fisher          | <a href="https://www.thermofisher.cn/cn/zh/home/global/forms/life-science/quantstudio-6-7-flex-software.html">https://www.thermofisher.cn/cn/zh/home/global/forms/life-science/quantstudio-6-7-flex-software.html</a> |
| METAGENassist                                                       | METAGENassist          | <a href="http://www.metagenassist.ca/METAGENassist/faces/Home.jsp">http://www.metagenassist.ca/METAGENassist/faces/Home.jsp</a>                                                                                       |
| mzVault                                                             | Thermo Fisher          | N/A                                                                                                                                                                                                                   |
| mzcloud™                                                            | Thermo Fisher          | <a href="https://www.mzcloud.org">https://www.mzcloud.org</a>                                                                                                                                                         |

## RESOURCE AVAILABILITY

### Lead contact

Further information and requests for resources and reagents should be directed to and will be fulfilled by the lead contact, Aline Bozec ([aline.bozec@uk-erlangen.de](mailto:aline.bozec@uk-erlangen.de)).

### Materials availability

This study did not generate new unique reagents.

### Data and code availability

- The 16S rRNA sequence datasets of this article have been deposited at the NCBI Sequence Read Archive (SRA) database under accession number [PRJNA979156](https://www.ncbi.nlm.nih.gov/bioproject/PRJNA979156), (<https://www.ncbi.nlm.nih.gov/bioproject/PRJNA979156>) and the metabolomics datasets have been deposited at the EMBL-EBI MetaboLights database with the identifier MTBLS7964 (<https://www.ebi.ac.uk/metabolights/MTBLS7964>). These data are publicly available as of the date of publication. Accession numbers of these data are listed in the [key resources table](#).
- This paper does not report original code.
- Any additional information required to reanalyze the data reported in this paper is available from the [lead contact](#) upon request.



## EXPERIMENTAL MODEL AND STUDY PARTICIPANT DETAILS

### Animal studies

#### *Mice and HFD-IMQ mouse model*

This work employed male C57BL/6NRj (Janvier labs) and both male and female C57BL/6-II17atm1Bcgen/J (IL17A-IRES-GFP-KI) mice (Jackson laboratory, Stock number #018472). The mice were housed with ad libitum access to food and drinking water in the local specific pathogen-free barrier facility with 20–24°C, 55 ± 10% and 12h light/dark cycle. For feeding experiments, 6–7 weeks old mice were maintained on diets with different fat content (ssniff Spezialdiaeten, [Table S4](#)) for 7 to 10 weeks. Treatment with vancomycin (VCM, DEMO Pharmaceuticals) was performed by supplementing the drinking water with 0.5 g/L of vancomycin for the last 2 weeks of the experiment. Live and heat killed *A. muciniphila* was suspended in 200 μL of anaerobic Dulbecco's phosphate buffered saline (DPBS, ThermoFisher Scientific) with indicated concentrations, and gavaged orally once daily for the last two weeks. Control group also received 200 μL of DPBS in the same manner. For heat killed *A. muciniphila*, the bacteria were inactivated by pasteurization for 30 min at 70°C. In chylomicron inhibition experiment, mice were gavaged indicated doses of lomitapide (Sigma-Aldrich) was suspended in 5 μL/g body weight of DPBS, and gavaged orally once daily for the last two weeks. Control group also received oral gavage of 5 μL/g body weight of DPBS. IMQ treatment was performed by administering 25mg/mouse of Aldara cream (Meda Pharmaceuticals) once daily. The cream was applied topically to the right ear of the mouse while the left ear was left untreated as a control. The treatment was applied for the last 3 days of the experiment. Total ear thickness was measured by caliper. Mice were sacrificed by CO<sub>2</sub> asphyxiation at the end of the experiment at an age of 14–17 weeks.

Animal experiments were approved by local ethics committee of Regierung von Mittelfranken (No. 55.2-2532-2-855).

#### *Metabolic cage*

Food consumption was measured using a metabolic cage system (OxyletPro System – Physiocage, Panlab). Briefly, 5 mice in the same cage were transferred to a metabolic cage 4 weeks after the start of the experiment, along with their food. They were monitored for food intake every 2 min for 48 h under free access to food and water in the animal house conditions described above. Data was analyzed and summarized using METABOLISM V3.0 software (Panlab).

## METHOD DETAILS

### Flow cytometry

Flow cytometry was performed using the Cytoflex S (Beckman Coulter). Organs were taken from the mice and prepared as outlined below for the different organs.

### Ear sample preparation

The ears were cut into small pieces and digested with 10 mL of HBSS with Ca<sup>2+</sup>, Mg<sup>2+</sup> + 10% fetal bovine serum (FBS) + 1000 U/ml collagenase II (Merck Millipore) + 0.1 mg/mL DNase I (Sigma-Aldrich) at 37°C with shaking at 300 rpm for 30 min. The buffer was replaced with flow cytometry buffer (DPBS +2% FBS +20 mM EDTA) and the resulting suspension was then transferred into gentleMACS C tubes (Miltenyi Biotec). Tissue dissociation was performed by using program B\_01 3 times in the gentleMACS tissue dissociator (Miltenyi Biotec). This was followed by washing step and straining through a 40 μm cell strainer, and then suspended into flow cytometry buffer for staining.

### Blood sample preparation

Blood was harvested from the mice using syringe and needles by cardiac puncture after euthanizing. To prevent clogging the blood was placed in a heparin tube (Micro tube 1.3mL LH, Sarstedt). The blood was then diluted with erythrocyte lysis buffer (150 mM NH<sub>4</sub>CL, 20 mM HEPES and 0.1 mM EDTA, pH 7.2) and incubated for 5 min at room temperature. The samples were washed and strained through a 40 μm cell strainer, re-suspended into flow cytometry buffer for staining.

### Spleen, lymph nodes and Peyer's patches sample preparation

The tissue was homogenized by a syringe plunger on a 40 μm strainer containing flow cytometry buffer. The resulting suspension was transferred through a new 40 μm strainer, washed and re-suspended in flow cytometry buffer for staining.

### Intestinal epithelial fraction sample preparation

Surrounding adipose tissue was removed from the small intestine, and the intestine was flushed with HBSS without Ca<sup>2+</sup>, Mg<sup>2+</sup> + 10 mM HEPES to remove intestinal content. Next, Peyer's patches were removed, and the intestine was longitudinally cut open followed by vigorous washing in fresh HBSS without Ca<sup>2+</sup>, Mg<sup>2+</sup> + 10 mM HEPES. This was repeated with fresh buffer until no visible increase in buffer turbidity was observed. The intestine was then cut into 1cm pieces and transferred into 20 mL of HBSS without Ca<sup>2+</sup>, Mg<sup>2+</sup> + 10 mM HEPES +1% FBS +1 mM dithiothreitol (DTT). The suspension was incubated at 37°C with 150 rpm shaking for 20 min. Follow incubation, the tissue was filtered on a 100 μm strainer, the tissue pieces retained on the strainer were then transferred to 20 mL of pre-digestion buffer (HBSS without Ca<sup>2+</sup>, Mg<sup>2+</sup> + 10 mM HEPES +1% FBS +1 mM DTT +2 mM EDTA) and incubated with shaking at 300 rpm at 37°C for 20 min. After the incubation, the tissues were vortexed for 20 s and again filtered on a

100  $\mu$ m strainer. This filtrate contained the intestinal epithelial fraction. The retentate was then re-incubated in pre-digestion buffer and the steps repeated to obtain two intestinal epithelial fractions. The two intestinal epithelial fractions were pooled and washed by flow cytometry buffer followed by filtering through a 40 $\mu$ m strainer. The filtrate was then again washed and re-suspended in flow cytometry buffer for staining.

### Lamina propria fraction sample preparation

Lamina propria was prepared by taking the leftover retained tissue-pieces from filtering to produce the intestinal epithelial fractions and washing it with 20 mL of HBSS without  $\text{Ca}^{2+}$ ,  $\text{Mg}^{2+}$  + 10 mM HEPES +1% FBS by incubating at 37°C with 150 rpm shaking for 20 min. The resulting suspension was filtered on a 100  $\mu$ m strainer and the retentate transferred into 10 mL of digestion buffer (HBSS with  $\text{Ca}^{2+}$ ,  $\text{Mg}^{2+}$  + 10% FBS +250 U/ml collagenase II + 0.1 mg/mL DNase I). The tissue was then digested by incubating at 37°C with shaking at 300 rpm for 30 min. Following digestion, the tissues were vortexed for 20 s and again filtered on a 100  $\mu$ m strainer. The flow-through was the lamina propria fraction. The retentate was once again transferred into 10 mL of digestion buffer, digested, vortexed, and filtered to obtain two lamina propria fractions. The fractions were pooled and washed by flow cytometry buffer for two times, and then re-suspended into flow cytometry buffer for staining.

### Colon sample preparation

Colon was flushed with DPBS, opened longitudinally, and washed in a dish with flow cytometry buffer followed by cutting it into pieces. The pieces were homogenized in a gentleMACS C tube containing 3mL of flow cytometry buffer using the gentleMACS tissue dissociator, program m\_intestine twice. Following homogenization, the sample was filtered through a 40 $\mu$ m strainer. This step was repeated if necessary, when the disuse was deemed as too viscous for the flow cytometer. The filtrate was washed and re-suspended in flow cytometry buffer for staining.

### Sample staining for analysis with flow cytometer

Staining was carried out by adding antibodies to a final dilution of 1:1000 in flow cytometry buffer to an aliquot of the final suspension obtained for each organ sample. The resulting mixture was incubated at 4°C protected from light for 20 min. To obtain the IL-17 production for each organ, the amount of IL-17+ cells were multiplied with the mean fluorescence intensity (MFI) of the IL-17+ cell population to obtain a normalized value of total contribution of IL-17 for each organ. The various staining panels employed are shown in Table S1. The Heilig and Tonegawa's nomenclature is employed in this manuscript to show  $\gamma\delta$  TCR.<sup>35</sup> TruStain FcX (anti-mouse CD16/32) Antibody was used as Fc block.

### Adoptive transfer model of IMQ dermatitis mice

$\gamma\delta$  T cell were purified by MACS Kit (Miltenyi Biotec) from IL-17A-GFP mice after 8-week HFD.  $2 \times 10^6$   $\gamma\delta$  T cell per mouse were injected intravenously into C57BL/6 recipient d1 post challenge with IMQ model as described in experimental model. The IMQ treatment was applied for 3 days once daily. Control mice received PBS +0.2% BSA alone. IL-17-GFP+  $\gamma\delta$  T cell infiltration of target organs in recipients were analyzed 2 days post transfer by flow cytometry. Spleen, IMQ ear and mLN were collected and prepared as described in the section: Ear sample preparation and Spleen, lymph nodes and Peyer's patches sample preparation.

### RNA extraction and cDNA synthesis

After mice were euthanized, organ samples for real-time PCR analysis were collected and snap frozen in Precellys lysing kit CK14 (Bertin instruments) immediately. The samples were kept in  $-20^\circ\text{C}$  until further procedure. Total tissue was homogenized using a Precellys 24 homogenizer (Bertin instruments) after adding 1mL of peqGOLD RNA PureFL (VWR). Following homogenization, the RNA was extracted according to the manufacturer's specifications. cDNA was synthesized by first pre-treating RNA with DNase I (ThermoFisher Scientific) followed by heat and EDTA inactivation of the DNase I according to manufacturer's specifications. cDNA was then synthesized using the High-Capacity cDNA Reverse Transcription Kit (ThermoFisher Scientific) according to the manufacturer's specifications. The synthesized cDNA was then used for real-time PCR.

### Real-time PCR

Real time PCR was performed using the Applied Biosystems SYBR Select Master Mix (ThermoFisher scientific) according to the manufacturer's specifications using CFX96 Touch Real-Time PCR Detection System (BioRad) or QuantStudioTM 6 Flex system (ThermoFisher scientific). The cycling parameters of the PCR program are 50°C for 2 min, 95°C for 10 min as the initial denaturation step followed by 40 cycles of 95°C for 15 s and 60°C for 1 min annealing/extension step. This is followed by a melting curve analysis; 95°C for 15 s, 60°C for 1 min and 95°C for 15 s. Data was analyzed using the  $\Delta\Delta\text{Ct}$  method using Actb as a housekeeping gene.

### Enzyme-linked immunosorbent assay (ELISA)

Serum was isolated using BD Microtainer Tubes (BD) according to manufacturer's specifications. ELISA was performed using commercially available kit according to the manufacturer's specifications. TMB Solution (ThermoFisher scientific) was used as enzyme substrate. Optical density was measured by SPECTRA MAX 190 (Molecular Devices).

### Histology

Tissues for histology were fixed in ROTI Histofix 4% (Carl Roth) overnight immediately after collection. Intestinal samples were embedded in 0.5% w/v of agarose low melt dissolved in DPBS prior to fixation with the agarose allowed to harden on ice before the tissue was fixed. Paraffin sections with the thickness of 6- $\mu$ m were prepared and stained with hematoxylin and eosin (H&E) and Alcian Blue-Periodic acid-Schiff (AB-PAS) stainings. Semi quantitative measurements for epidermal thickness and average PAS layer thickness were performed using Adobe Photoshop (Adobe). Epidermal thickness was calculated by manually measuring the area of the epidermis of whole ear and dividing by its length. Average PAS layer thickness was calculated by manually measuring the PAS positive area surrounding the villi and the villi surface length. The length of the villi surfaces then divided the positive area to obtain the average PAS layer thickness. Unless otherwise mentioned, displayed small intestine histology is from tissue collected at ~25% of the length of the small intestine.

### Immunofluorescence

Immunofluorescence was performed after antigen retrieval as follows. 2 min sequential boiling steps in a microwave with TE (10 mM Tris +1 mM EDTA +0.05% Tween, pH 9.0) buffer and Citrate (10 mM Citrate, pH 6.0) buffer in order, Citrate, TE, Citrate, TE, Citrate. The slides were cooled at room temperature for 30 min following antigen retrieval, washed once with DPBS and blocked with 5% horse serum for 1h at room temperature. The blocking solution was then removed and staining with primary antibodies: rabbit anti-MUC2 (1:100, Novus, NBP1-31231) or rabbit anti-IL-17A (1:300, abcam, ab79056) were carried out in 5% horse serum in DPBS overnight at 4°C. The next day, the slides were washed in DPBS and the secondary antibody was applied and slides were incubated for 2h at room temperature followed by an additional two washes in DPBS. Washed slides were mounted using VECTASHIELD Antifade Mounting Medium with DAPI (Vector labs) prior to fluorescence microscopy.

### Microscopy

Bright field and Fluorescence microscopy was performed using the Keyence BZ-X710 microscope.

### Intestinal permeability assay

Mice were fed by oral-gavage with 0.44 mg/g body weight of FITC-labelled 4 kDa dextran that has a diameter of approx. 6nm (Tdb Labs). Dextran was dissolved at 100 mg/mL in DPBS. Following gavage, the mice were fasted for 4 h, serum isolated and the fluorescence of the serum was measured using an Infinite F200 Pro plate reader (Tecan). Filter setup was as follows: excitation wavelength filters of 485 nm and Emission Wavelength filters of 535 nm. Excitation bandwidth was 20 nm and emission bandwidth 25 nm.

### Stool DNA isolation

Stool from the small intestine and caecum was collected in Precellys lysing MK28 (Bertin instruments) separately, followed by storage at  $-20^{\circ}\text{C}$  until DNA extraction. DNA was extracted from frozen stool by using the QIAamp Fast DNA Stool Mini Kit (Qiagen) according to the manufacturer's specifications with modifications as follows. A homogenization step was inserted between step 2 and step 3 of the protocol supplied with the kit (following the addition of "inhibitEX" buffer and prior to sample heating). Briefly, 100–150 mg stool samples are lysed in InhibitEX Buffer effectively by incubating the stool homogenate at  $95^{\circ}\text{C}$  to separate DNA-degrading substances and PCR inhibitors. The sample matrix is pelleted by centrifugation and the DNA in the supernatant is purified on QIAamp Mini spin columns. The QIAamp DNA purification procedure involves digestion of proteins, binding DNA to the QIAamp silica membrane. Proteins are digested and degraded under denaturing conditions during a  $70^{\circ}\text{C}$  incubation with proteinase K. Optimized buffering conditions (Buffer AL + fresh ethanol) in the lysate ensure that the remains of digested proteins and other impurities, which can inhibit PCR and other downstream enzymatic reactions, are not retained on the QIAamp membrane and allow optimal binding of DNA to the QIAamp membrane. DNA is adsorbed onto the QIAamp silica membrane during a brief centrifugation step. DNA bound to the QIAamp membrane is washed by Buffer AW1 and Buffer AW2 to ensure complete removal of any residual impurities. At last, purified, concentrated DNA is eluted from the QIAamp Mini spin column in low-salt buffer (Buffer ATE) equilibrated to  $37^{\circ}\text{C}$ .

### 16s ribosomal RNA sequence analysis

The V4 regions of the 16S rRNA genes were amplified using 10 ng of bacterial template DNA with region-specific primers (515F: 5'-GTGYCAGCMGCCGCGGTAA-3'; 806R: 5'-GACTACNVGGGTWTCTAAT-3') containing barcodes and Illumina flow cell adaptor sequences (PMID: 26271760) in a reaction consisting of 25 PCR cycles ( $95^{\circ}\text{C}$  45 s,  $50^{\circ}\text{C}$  60 s,  $72^{\circ}\text{C}$  90 s) using the NEBNext Ultra II Q5 Master Mix (New England Biolabs, Ipswich, MA). Amplicons were purified with Agencourt AMPure XP Beads (Beckmann Coulter, Brea, CA), normalized and pooled before sequencing on an Illumina MiSeq device using the Illumina V2 chemistry. The DADA2 (PMID: 27214047) plugin within Qiime2 (PMID: 31341288) was used to establish amplicon sequencing variants (ASVs). Qiime2 q2-feature-classifier using the SILVA database (v138) was used to assign taxonomy to ASVs OTUs. Data was analyzed by METAGENassist platform (<http://www.metagenassist.ca/METAGENassist/faces/Home.jsp>).

### $\gamma\delta$ T cell sorting

$\gamma\delta$  T cells were sorted from spleen of C57BL/6 male mice fed ND or HFD for 8 weeks. Spleen was cut into pieces and digested in HBSS with  $\text{Ca}^{2+}$ ,  $\text{Mg}^{2+}$  + 10% FBS +400 U/ml collagenase II + 0.1 mg/mL DNase I at  $37^{\circ}\text{C}$  for 20 min. The resulting suspension

was filtered on a 40  $\mu\text{m}$  strainer and was washed by sorting buffer (DPBS +2% FBS +2 mM AccuGENE EDTA), and then diluted with erythrocyte lysis buffer and incubated for 10 min at room temperature. Following ery-lysis, cell suspension was washed and re-suspended in sorting buffer containing staining antibodies shown in Table S2. Cells were stained for 30 min in the dark at 4°C, and then washed and re-suspended in the sorting buffer at the concentration of  $5 \times 10^7/\text{mL}$ .  $V\gamma 4+\text{TCR}\delta+\text{CD}3+$  lymphocytes and  $V\gamma 1-V\gamma 4-\text{TCR}\delta+\text{CD}3+$  lymphocytes were sorted using MoFlo Astrios EQ (Beckman Coulter), and then the RNA was extracted using RNeasy Mini Kit (Qiagen) according to the manufacturer's specifications.

### TCR repertoire analysis

A molecular amplification fingerprinting (MAF) strategy was incorporated during library preparation. Extracted RNA was transcribed into cDNA using primers specific for TCRD and TCRG constant regions including a Reverse Identifier (RID) and Illumina Adapter sequences. cDNA synthesis was followed by clean-up with SPRI beads (Agencourt AMPure XP, Beckman Coulter). cDNA was used in a multiplex PCR for various TCRG and TCRD V genes. V-gene specific primers included Forward Identifiers (FID) and Illumina Adapter sequences. After clean-up with Ampure Beads, individual sample indices were added to the PCR amplicons using Illumina Nextera i5 and i7 primers (Nextera XT Index Kit, Illumina). Sequencing was performed on the MiSeq platform (Illumina) with a 300 bp  $\times$  300 bp configuration. Paired-end reads were merged with the IgRepertoireConstructor (IgReC). Read Quality was ensured by FASTQC quality analysis. PCR bias or sequencing errors were corrected by considering sequences containing both RIDs and FIDs only. Read counts were normalized to unique RID counts. VDJ annotation was conducted with the Change-O wrapper for IgBLAST using IMGT references. Normalized reads were summarized in clonotype tables according to their CDR3 amino acid sequence using dplyr, tidyr and visualized with ggplot2. Diversity estimates based on clonotype distributions were calculated with the immunarch package.

### Liquid chromatography - Mass spectrometry (LC/MS)

Cells were lysed with 1 mL of ice-cold methanol/water (80/20 v/v) containing four recovery standards in order to monitor sample preparation. The standards included tridecanoic acid (25  $\mu\text{g}/\text{mL}$ ), DL-2-fluorophenylglycine (2.5  $\mu\text{g}/\text{mL}$ ), DL-4-chlorophenylalanine (10  $\mu\text{g}/\text{mL}$ ) (all three from Merck, Darmstadt, Germany) and [ $^2\text{H}_6$ ]-cholesterol (25  $\mu\text{g}/\text{mL}$ ; Avanti Polar Lipids, Alabaster, AL, USA). After centrifugation at 16000 rpm and 4°C for 5 min using an Eppendorf 5427 R centrifuge (Eppendorf, Hamburg, Germany), 2  $\times$  350  $\mu\text{L}$  of the supernatant of each sample were pipetted into two separate LC vials (VWR, Darmstadt, Germany). A pool sample was prepared by mixing 230  $\mu\text{L}$  of the supernatant of each sample. From this mixture, 350  $\mu\text{L}$  were taken into LC vials for each QC sample. Reference samples were prepared by pipetting 350  $\mu\text{L}$  of the lysis solution. All samples were dried under a gentle stream of nitrogen at 30°C. Subsequently, the dried samples were reconstituted in 200  $\mu\text{L}$  of hydrophilic interaction chromatography (HILIC) eluent (acetonitrile 95%, 5% water, 0.1% formic acid (all three from VWR chemicals, Darmstadt, Germany), 10 mM ammonium formate (Merck, Darmstadt, Germany) or 200  $\mu\text{L}$  reverse phase (RP) eluent (99.5% water, 0.5% methanol (VWR chemicals, Darmstadt, Germany), both 0.1% formic acid). The eluents contained nine internal standard in order to monitor instrument performance: [ $^2\text{H}_{28}$ ]-hexadecanedioic acid (10 ng/mL), [ $^2\text{H}_{24}$ ]-tetradecanedioic acid (5 ng/mL), [ $^2\text{H}_3$ ]-carnitine (1 ng/mL) (all three EQ Laboratories, Augsburg, Germany), imipramine (0.5 ng/mL; Merck, Darmstadt, Germany), [ $^2\text{H}_3$ ]-creatinine (2 ng/mL; CDN Isotopes, Pointe-Claire, QC, Canada), [ $^2\text{H}_3$ ]-trimethylamine-N-oxide (0.86 ng/mL; Cambridge Isotope Laboratories, Tewksbury, MA, USA), [ $^2\text{H}_6$ ]-tryptophan (40 ng/mL; Santa Cruz Biotechnology, Heidelberg, Germany), [ $^2\text{H}_7$ ]-arginine (100 ng/mL; Cambridge Isotope Laboratories, Tewksbury, MA, USA) and [ $^2\text{H}_7$ ]-glucose (1 ng/mL; Merck, Darmstadt, Germany).

All analyses were performed on a Dionex Ultimate 3000 chromatographic system hyphenated to a Q Exactive Focus mass spectrometer (both from Thermo Fisher Scientific, Dreieich, Germany) with a heated electrospray source. The instrument was controlled over TraceFinder 4.1 (Thermo Fisher Scientific, Dreieich, Germany). Each sample was analyzed via both, HILIC and RP chromatographic separation. Furthermore, each chromatographic separation was analyzed in positive and negative mode resulting in four runs per sample. HILIC separation was achieved on an Acquity UPLC BEH Amide, 1.7  $\mu\text{m}$ , 2.1  $\times$  100 mm column, whereas RP separation was performed on an Acquity UPLC BEH C18, 1.7  $\mu\text{m}$ , 2.1  $\times$  100 mm columns. For both columns, 2.1  $\times$  5 mm guard columns were installed in order to prolong column lifetime (all columns from Waters, Eschborn, Germany). For both chromatographic separations, the column temperature was 40°C, the flow rate 0.35 mL/min and the injection volume 2  $\mu\text{L}$ . The HILIC eluent was A: water, 0.1% formic acid, 10 mM ammonium formate and B: acetonitrile 95%, 5% water, 0.1% formic acid, 10 mM ammonium formate. The RP eluent was A: water, 0.1% formic acid and B: methanol, 0.1% formic acid. For HILIC and RP a gradient elution program was used with details shown in Table S2. The Q Exactive Focus mass spectrometer was operated with a capillary voltage of  $-3$  kV in negative mode and 3 kV in positive mode. The capillary temperature was 380°C and the auxiliary gas temperature was 400°C. The sheath gas pressure, auxiliary gas pressure and sweep gas flow rate were set to 60, 20, and 0 arbitrary units, respectively. Nitrogen 5.0 was used for these gases. The scanning range was 66.7–1000 m/z in both ionization modes. Furthermore, the mass spectrometer was operated in discovery acquisition mode, whereby the instrument switches between full scan and ddMS2 mode allowing for a better annotation of the most abundant features. Resolution of the analyser in full scan was set to 70000 and the maximum inject time set to auto with an AGC target of  $1\text{e}6$ . In ddMS2, resolution was set to 35000 with the maximum injection time set to auto and an AGC target of  $5\text{e}4$ . Prior to each run, the mass spectrometer performance was evaluated and calibrated according to the manufacturer's recommendations.

For each of the four LC-MS modes, i.e. HILIC positive, HILIC negative, RP positive and RP negative, a sequence was established including samples from the present study, blanks, QC standards (pooled samples) and reference standards, whereby the samples

from this study were randomly distributed over the sequence. Retention times and peak areas of the QC sample compounds were monitored in all samples (tolerance for retention time variations =  $\pm 0.1$  min; tolerance for peak area variations =  $\pm 15\%$ ).

For metabolomics data analysis, Compound Discoverer 3.1 was used (Thermo Fisher Scientific, Dreieich, Germany). Minimum peak intensity for detection was set to  $1e5$ . Features were grouped and identified with a mass tolerance of 5 ppm and an RT tolerance of 0.2 min. Normalization factors for each sample were based on the cell number of the respective sample from the present study. Differential analysis was performed using the log-transformed values for the peak area of a feature. Adjusted p values were calculated using Benjamini-Hochberg correction, whereby adjusted p values of  $\leq 0.05$  were considered as statistically significant. Compound annotations were made by the software using mzcloud, mzVault and ChemSpider databases. Annotations were defined in four levels based on which software was used and the match quality (for mzcloud and mzVault).

Metabolic pathway enrichment analysis was performed by MetaboAnalyst platform (<https://www.metaboanalyst.ca/>).

### QUANTIFICATION AND STATISTICAL ANALYSIS

Statistical analysis was carried out using GraphPad Prism software v9.1.1 (GraphPad software) with indicated methods in the figure legends. All values were conducted as the mean  $\pm$  SD. p values less than 0.05 were regarded as statistically significant.

Cell Reports, Volume 42

**Supplemental information**

**High-fat-diet-associated intestinal microbiota  
exacerbates psoriasis-like inflammation  
by enhancing systemic  $\gamma\delta$  T cell IL-17 production**

**Koshiro Sonomoto, Rui Song, Daniel Eriksson, Anne M. Hahn, Xianyi Meng, Pang Lyu, Shan Cao, Ning Liu, R. Verena Taudte, Stefan Wirtz, Yoshiya Tanaka, Thomas H. Winkler, Georg Schett, Didier Soulat, and Aline Bozec**

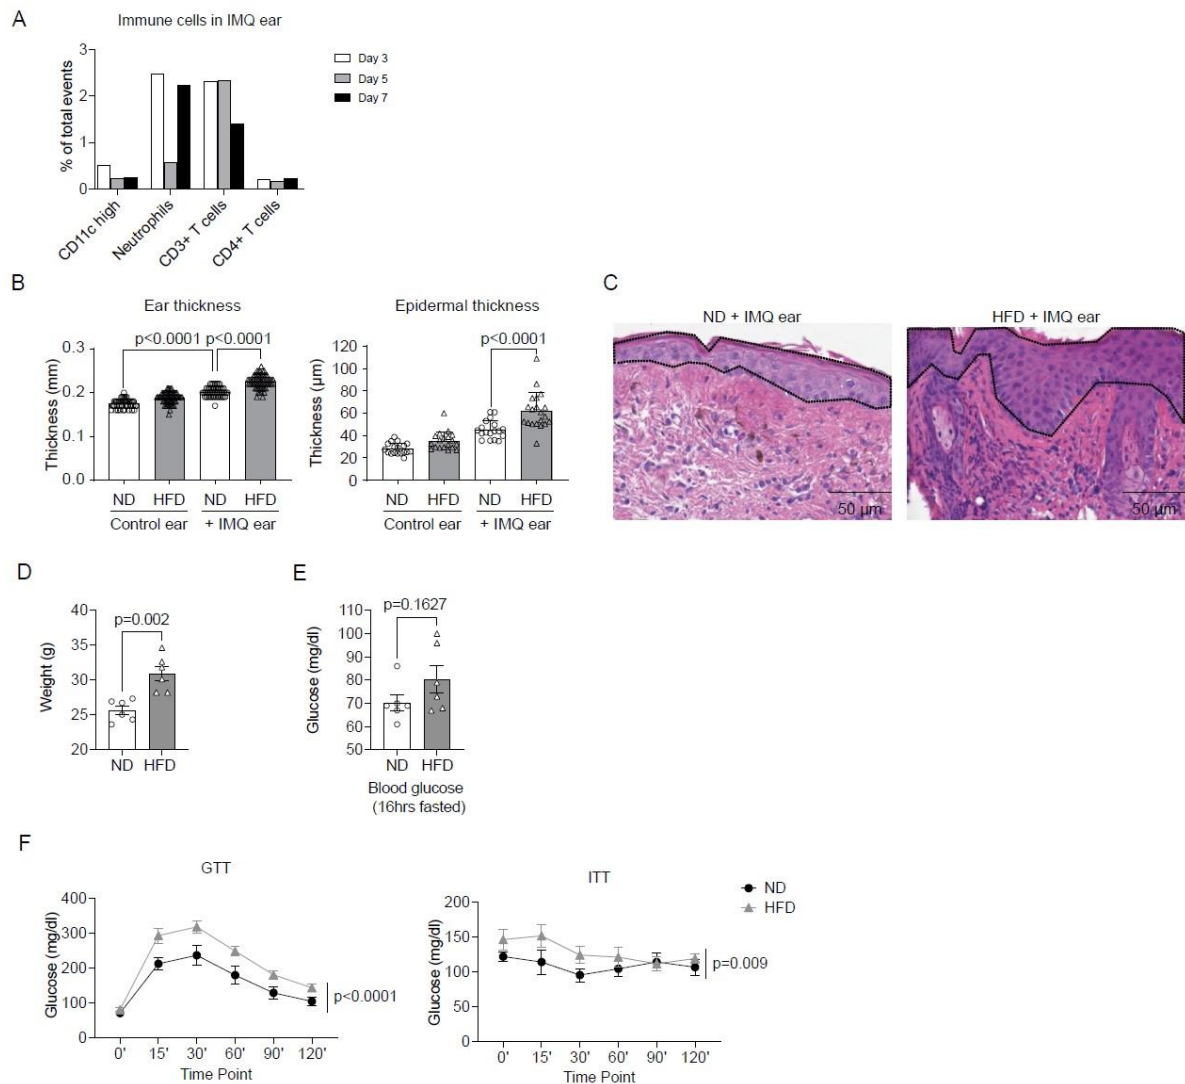

**Figure S1. Immune cells infiltration in the ear, body weight and blood glucose level after HFD, related to Figure 1**

(A) Immune cells in the inflammatory ear measured by flow cytometry on different time point post imiquimod (IMQ) treatment. Gating strategy is shown in supplementary figure 3 (B-D) C57BL/6 mice were initially fed with ND or HFD for 8 weeks. (B) Ear thickness measured by caliper ( $N = 40$ ) and quantification of epidermal thickness in histology ( $N = 20$ ) in C57BL/6 mice fed with normal diet (ND; 3.3% fat) or high-fat diet (HFD; 35.7% fat) for 8 weeks with or without IMQ ear treatment. (C) Representative H&E staining of sections of the skin of the ear; epidermis is highlighted by broken lines. (D) Body weight (E) Blood glucose level after 16 hours fasting. (F) Glucose tolerance test (GTT) and Insulin tolerance test (ITT). Number of mice per group for B-D ( $N = 6$  per group). Bars show the mean  $\pm$  SD. p-values were calculated by analysis of variance followed by Sidak's post-hoc tests for comparison of multiple groups or unpaired Student's t-test for D-E, and according to two-way ANOVA followed by Bonferroni post hoc test for F.

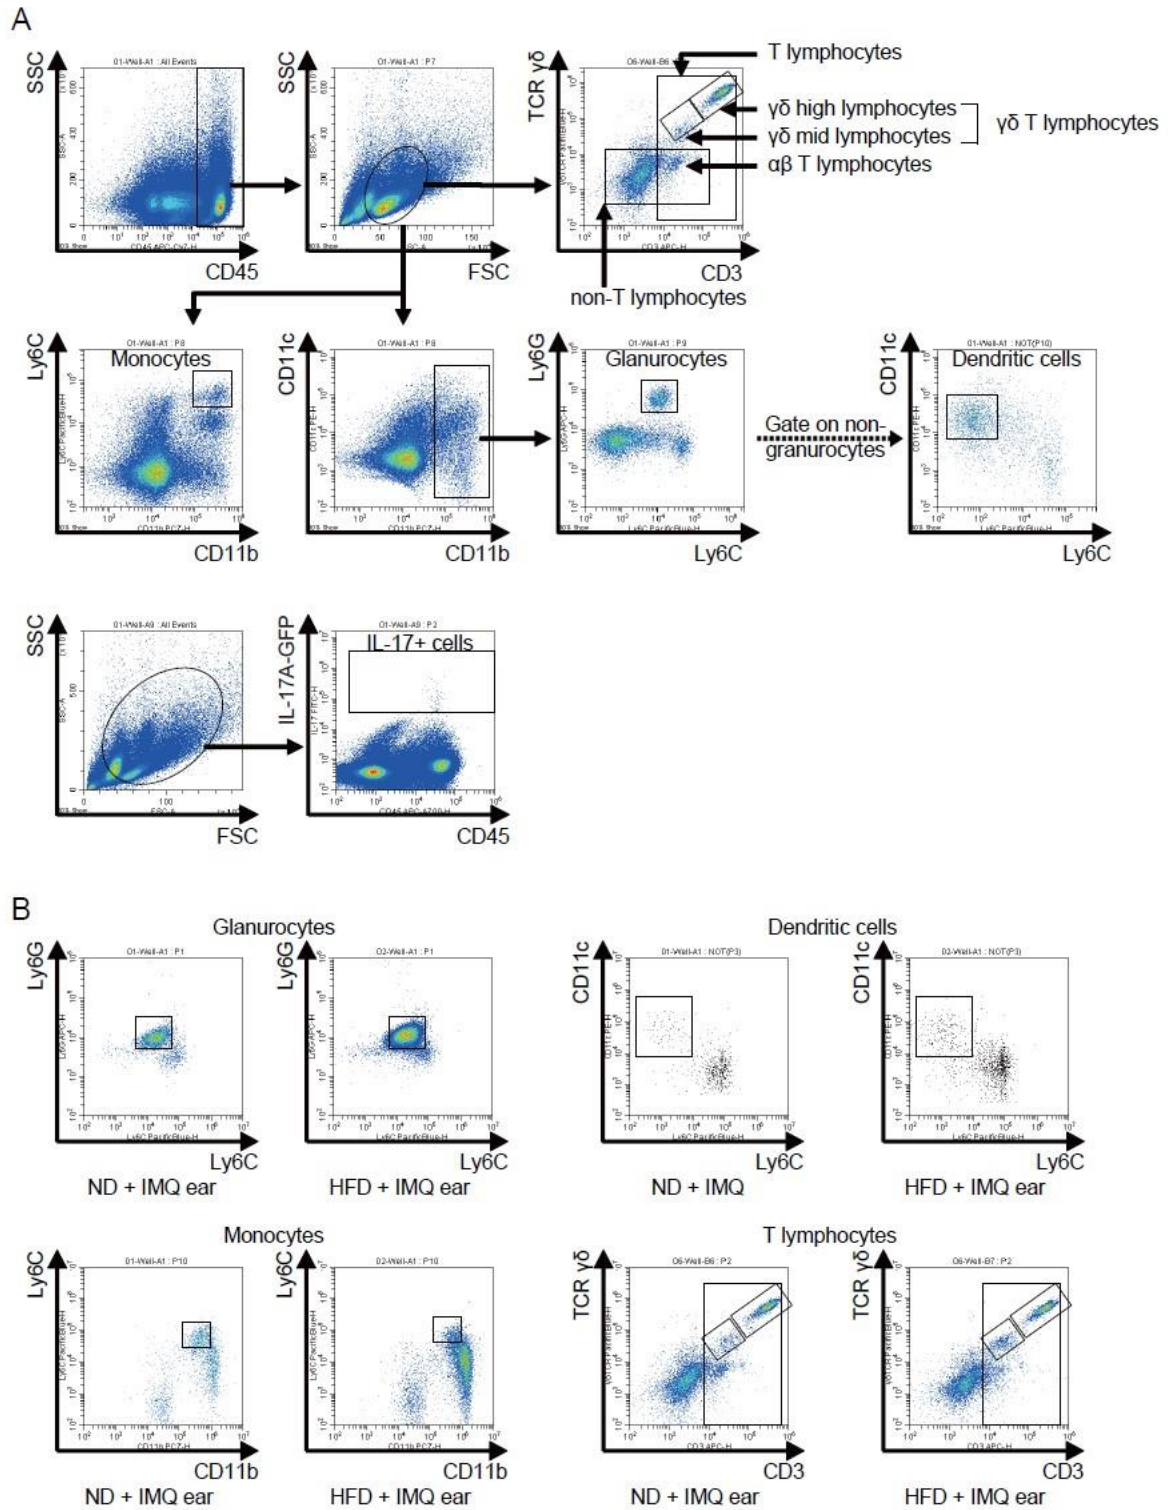

**Figure S2. Gating strategies for immune cells in the affected skin, related to Figure 1**

(A) Gating strategy for immune cell populations. (B) Representative dot plots of immune cells in the ear summarized in Figure 1C.



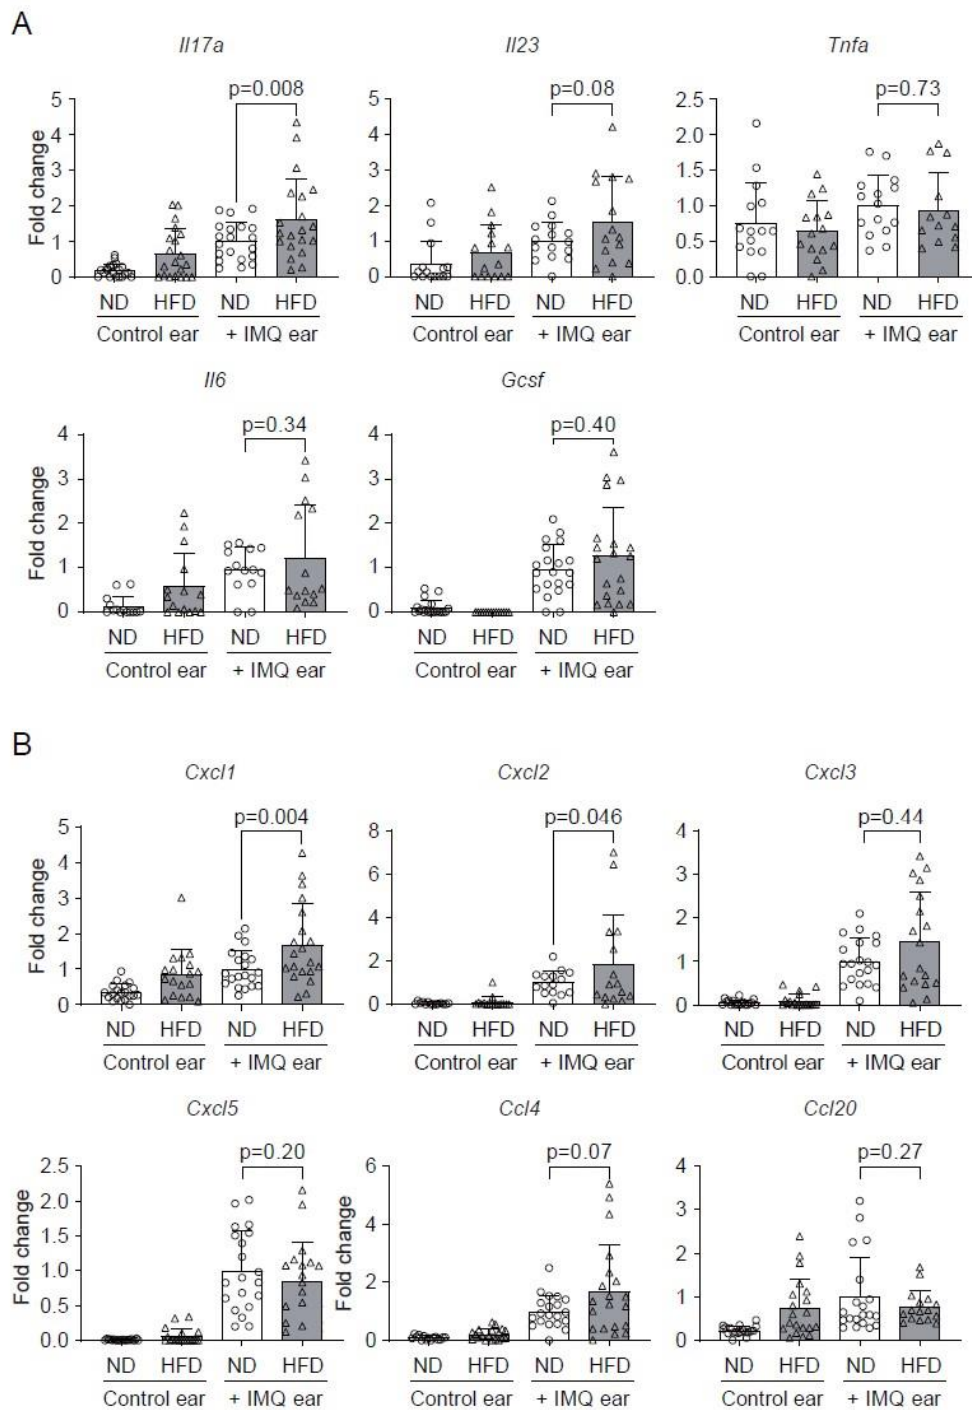

**Figure S3. High fat diet induces *Il17*, *Il23* and chemokines expression in the skin, related to Figure 1**

Real time PCR quantification of cytokines (A) and chemokines (B) mRNA levels in the affected (IMQ challenge for 3 days) and unchallenged skin of C57BL/6 mice fed with normal diet (ND; 3.3% fat) or high-fat diet (HFD; 35.7% fat). Bars show the mean  $\pm$  SD, p-values were calculated by unpaired Student's t-test (N = 20).

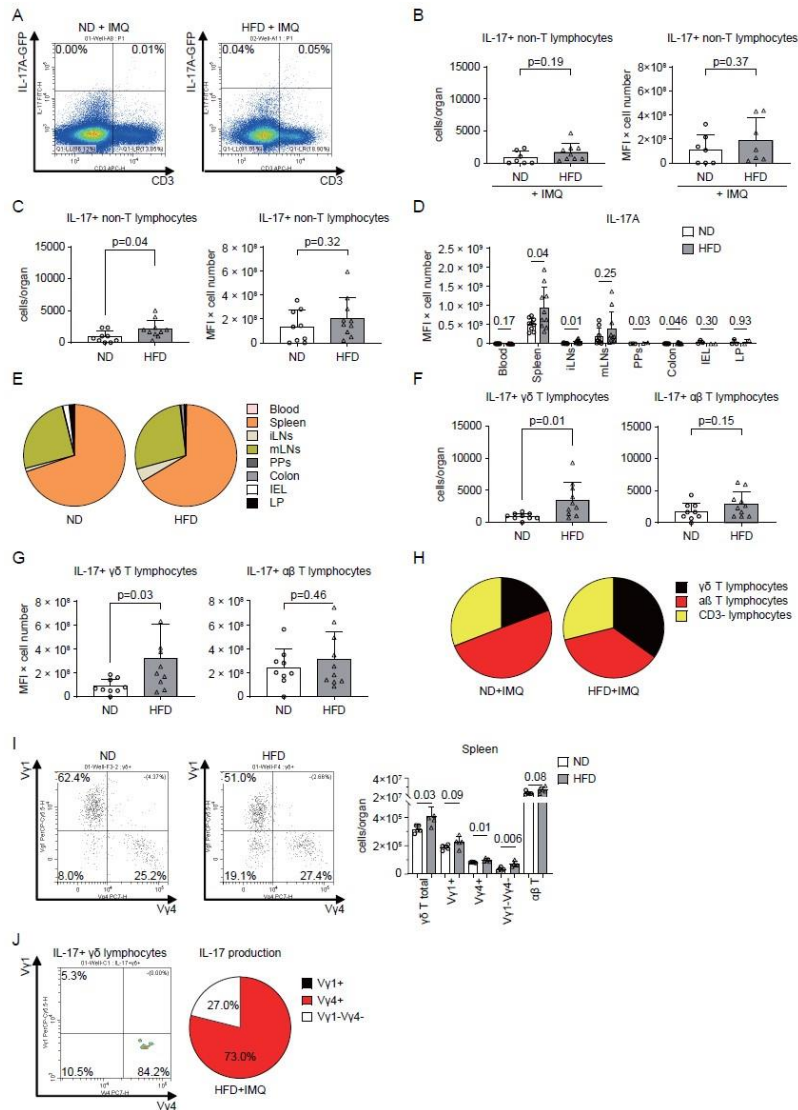

**Figure S4. Induction of V $\gamma$ 4+ cells by HFD, related to Figure 2**

(A) Representative dot plot showing IL17+  $\gamma\delta$ + T lymphocytes in the spleen of IL-17 reporter mice fed with normal diet (ND; 3.3% fat) or high-fat diet (HFD; 35.7% fat) for 8 weeks and challenged with imiquimod (IMQ). (B) Number and IL-17 production of IL-17+ non-T lymphocytes in the spleen analysed by flow cytometry in IL-17 reporter mice fed with ND or HFD and challenged with IMQ (N = 7 - 9). (C) Number and IL-17 expression of IL-17+ non-T cells in the spleen in IL-17 reporter mice fed with ND or HFD without IMQ (N = 9 - 10). (D) IL-17 production from different organs and (E) contribution of organs to IL-17 production in IL-17 reporter mice fed with ND or HFD without IMQ (N = 9 - 10). (F) Number and (G) IL-17 production (MFI) of IL-17+  $\gamma\delta$  and  $\alpha\beta$  T lymphocytes in the spleen (N = 9 - 10); (H) Contribution of IL-17 expressing cells to IL-17 production in the spleen. (I) Analysis of  $\gamma\delta$  T lymphocytes subset categorized by V $\gamma$  chain expression in the spleen of wild-type mice fed with ND or HFD without IMQ challenge. Plots show V $\gamma$  chain expressions of CD45+CD3+ $\gamma\delta$  TCR+ pre-gated cells. Number of lymphocyte subsets are shown in the bar graph (N = 5). (J) Plot shows the representative V $\gamma$  chain expression of CD45+CD3+ $\gamma\delta$ TCR+IL-17+ pre-gated cells. The proportion of IL-17 production by  $\gamma\delta$  T lymphocyte subsets are shown in the circle graph. iLNs; inguinal lymph nodes. mLNs; mesenteric lymph nodes. PPs; Peyer's patches. IEL; intra-epithelial lymphocytes. LP; lamina propria cells. Bars show the mean  $\pm$  SD, P-values were calculated by unpaired Student's t-test and are shown above each group.

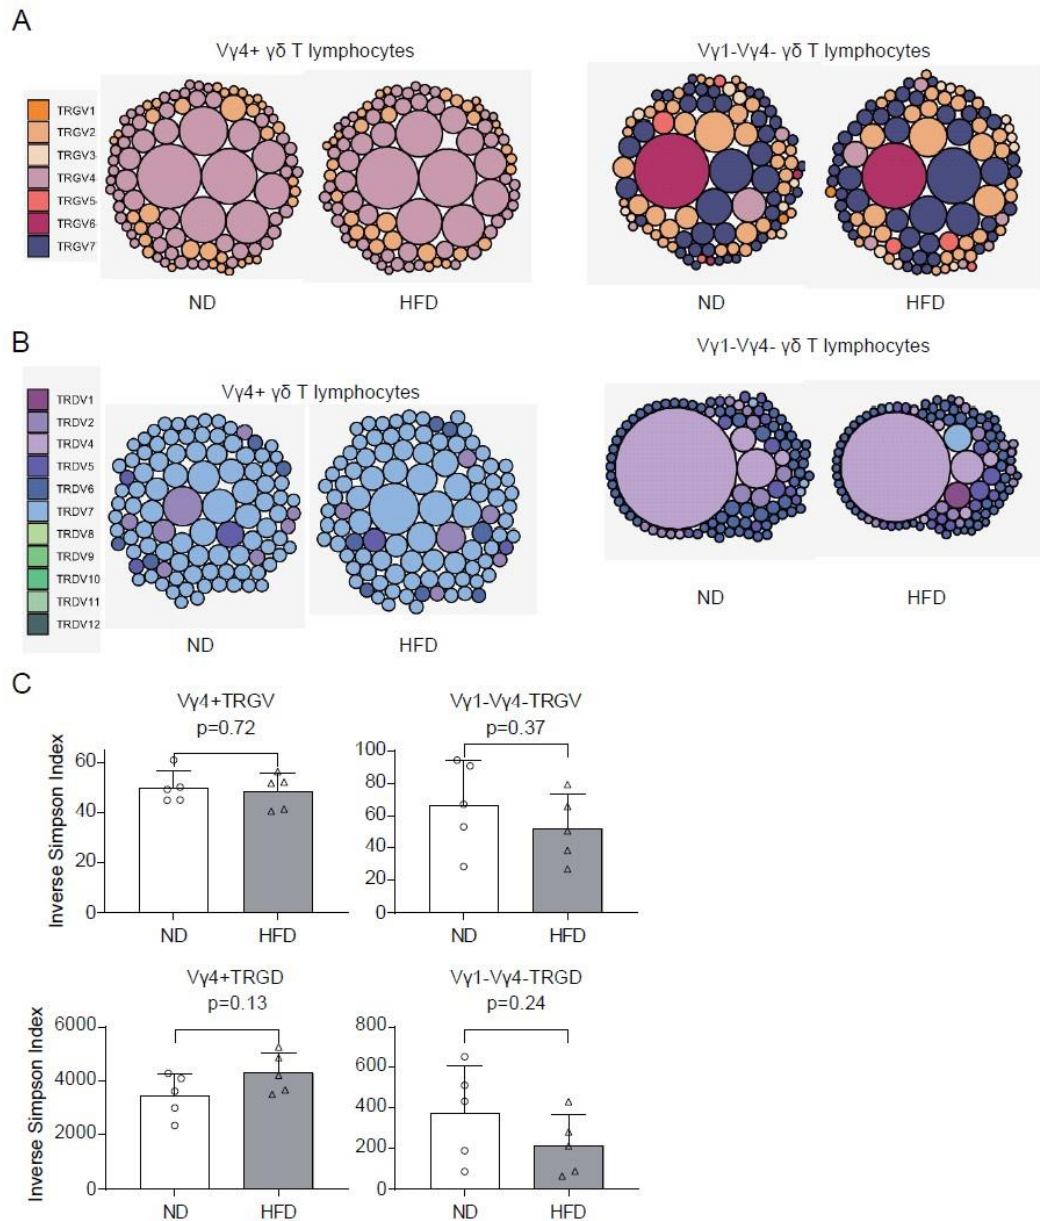

**Figure S5.  $\gamma\delta$  TCR repertoire analysis, related to Figure 2**

$\gamma\delta$  TCR+ lymphocytes according to their surface expression of V $\gamma$  chains sorted from the spleen of mice fed with normal diet (ND; 3.3% fat) or high-fat diet (HFD; 35.7% fat). CDR3 regions of TRG and TRD chains were amplified and sequenced. (A, B) Top 100 clonotypes based on AA sequence, colored according to TRG-V gene usage (A), or TRD-V gene usage (B) are shown. (C) The clonality of TRG and TRD repertoires is shown as Inverse Simpson index. P-values were calculated by Student's t-tests (N = 5).

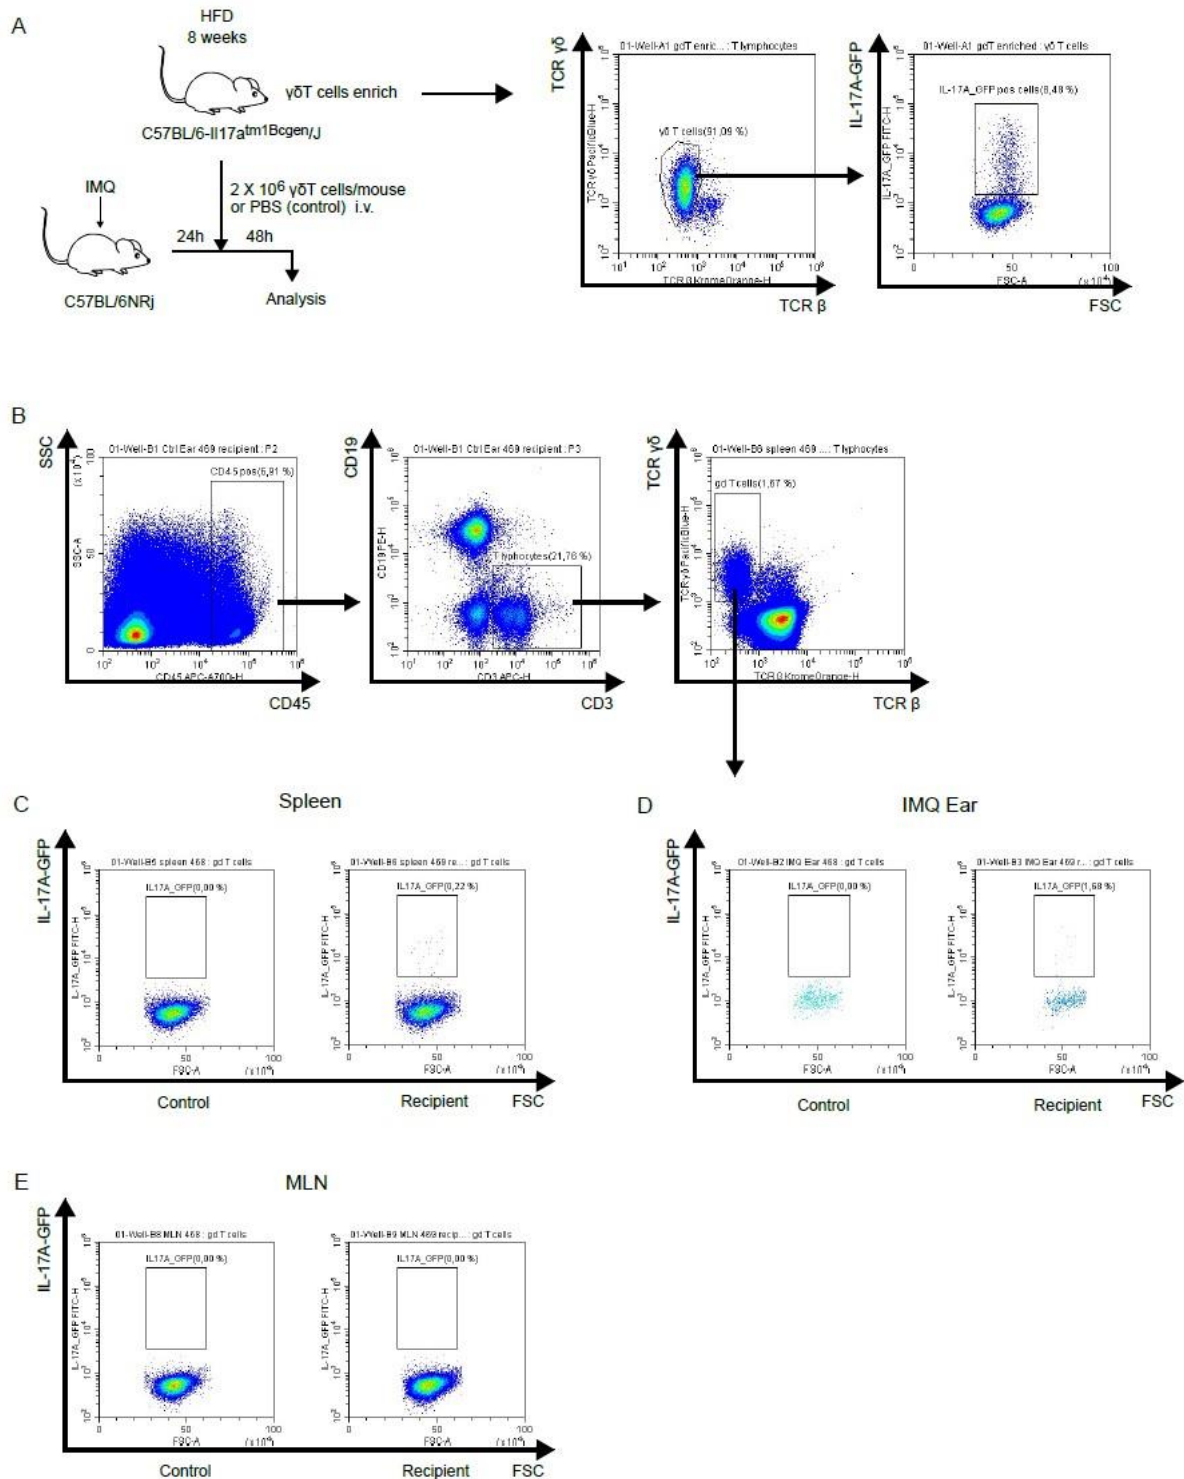

**Figure S6. IL-17<sup>+</sup>  $\gamma\delta$ T cells from the spleen are recruited to the skin to increase dermal inflammation, related to Figure 2**

(A) Scheme of adoptive transfer model. The flow cytometry graph shows the purity of  $\gamma\delta$ T cell after enrichment and the proportion of IL-17<sup>+</sup>  $\gamma\delta$ T cells. (B) Gating strategy of IL-17<sup>+</sup>  $\gamma\delta$ T cells. (C-E) Proportion of IL-17<sup>+</sup>  $\gamma\delta$ T cell in spleen, imiquimod (IMQ) ear and mesenteric lymph nodes (mLNs) from mice with or without adoptive transfer.

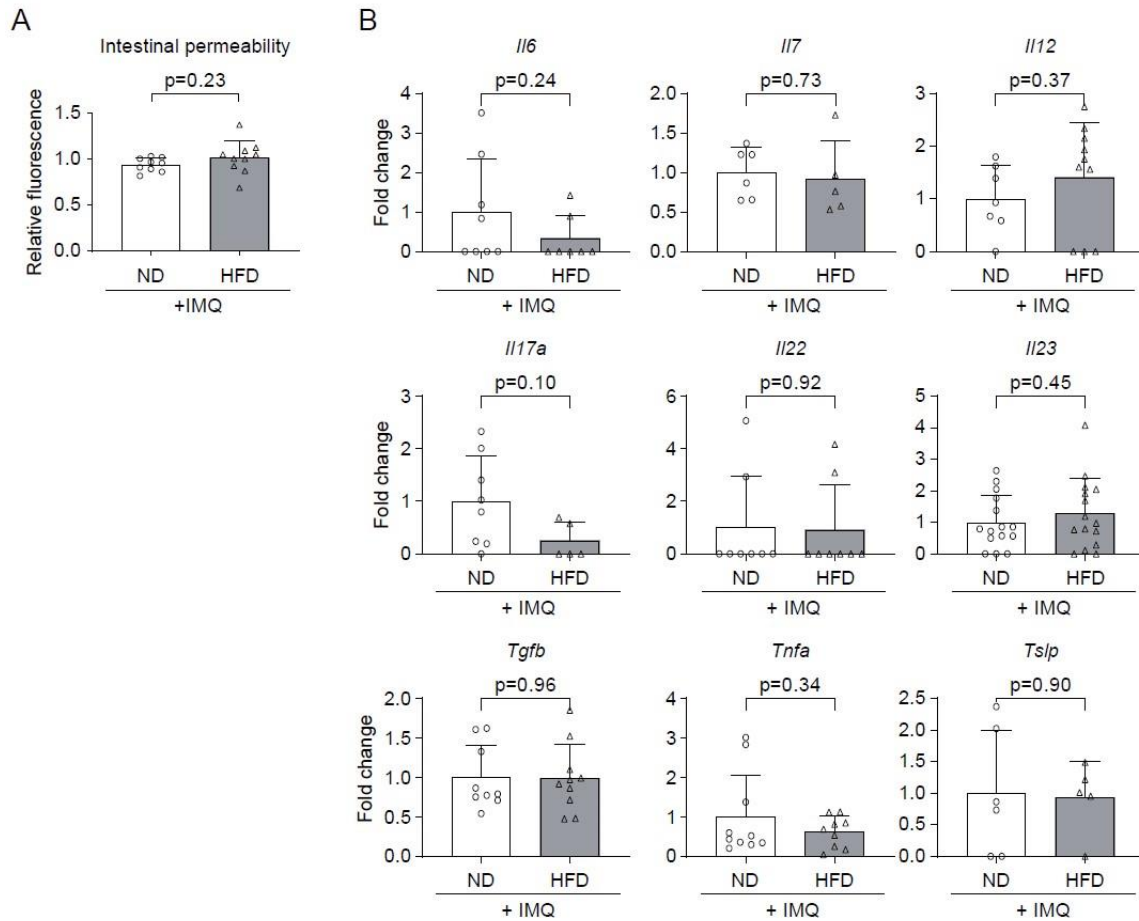

**Figure S7. Barrier function and intestinal cytokines after dietary metabolic stress, related to Figure 3**

C57BL/6 mice were fed with normal diet (ND; 3.3% fat) or high-fat diet (HFD; 35.7% fat) for 8 weeks and challenged with imiquimod (IMQ). (A) Mice received oral gavage of FITC-dextran (4 kDa) and their serum was collected after four hours starvation. Relative FITC fluorescence to ND group is shown (N = 5) (B) Real time PCR of cytokines in the small intestine (the first half of ileum) (N = 5). Bars show the mean ± SD, P-values were calculated by unpaired t-tests and are shown above each group.

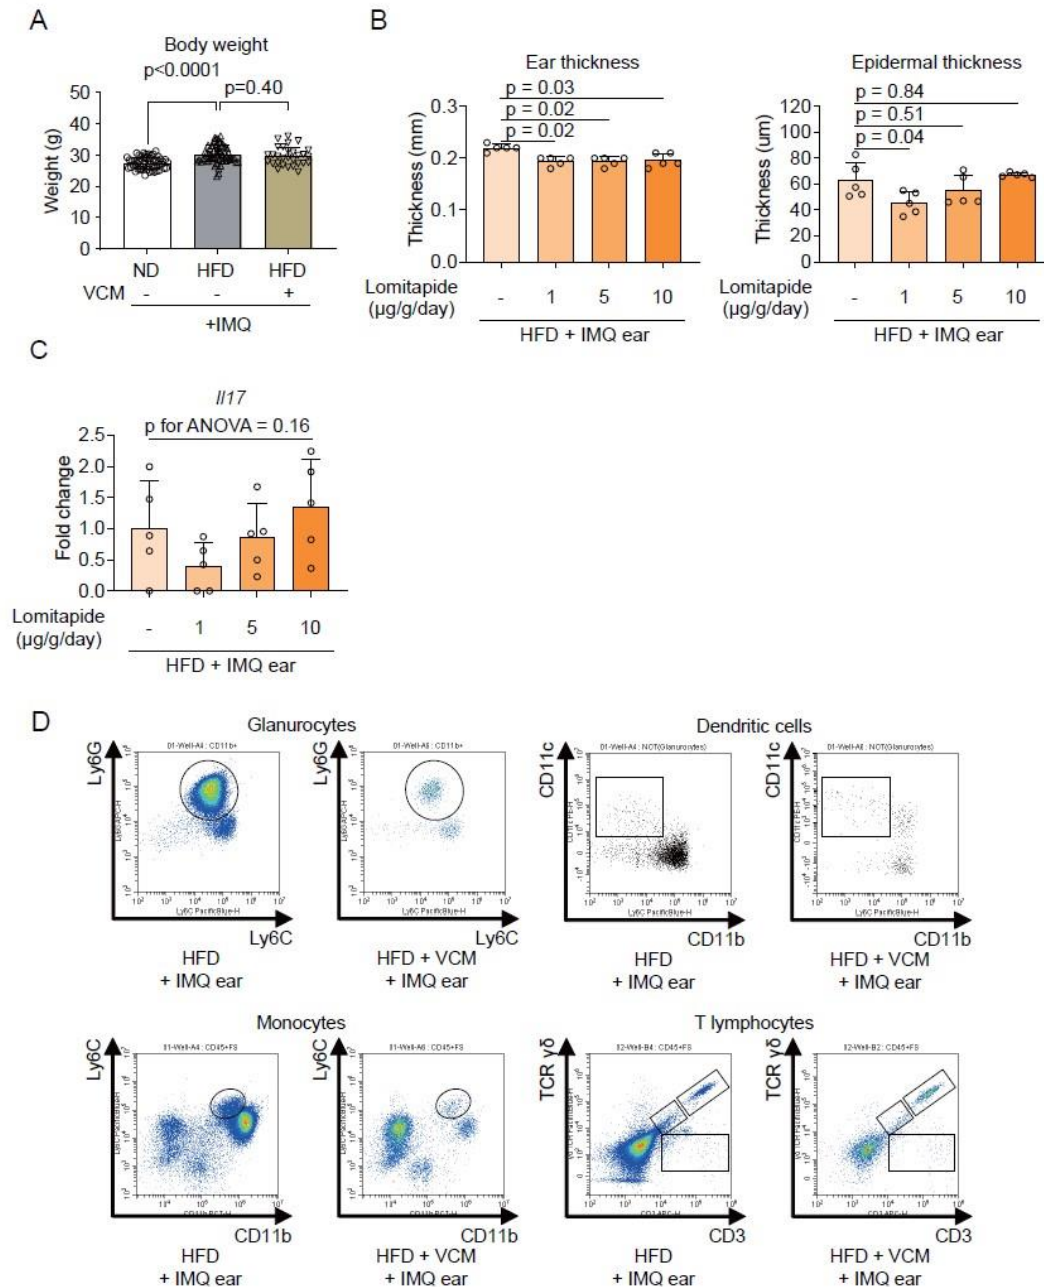

**Figure S8. Body weight and adaptation of the microbiota changes after dietary metabolic stress, related to Figure 4**

C57BL/6 mice were fed with normal diet (ND; 3.3% fat) or high-fat diet (HFD; 35.7% fat) for 8 weeks and challenged with imiquimod (IMQ). 0.5 mg/dl of vancomycin (VCM) was administrated as drinking water for the last two weeks. (A) Body weight. (HFD; N = 60, HFD + VCM; N = 30). (B, C) C57BL/6 mice were fed high-fat diet (HFD; 35.7% fat) for 8 weeks and were challenged with imiquimod (IMQ). Mice received lomitapide by oral gavage once daily for the last two weeks of the experiments. Group without lomitapide (described as “ - ” in the figures) received DPBS gavage instead. (B) Ear thickness measured by caliper and quantification of epidermal thickness in histopathology sections shown (N = 5); (C) Real time PCR of *Il17a* (N = 5). (D) Representative dot plots of flow cytometry analysis of immune cells in the skin from Figure 4D. Bars show the mean  $\pm$  SD, p-values were calculated by analysis of variance followed by Sidak’s post-hoc tests for comparison of groups indicated.

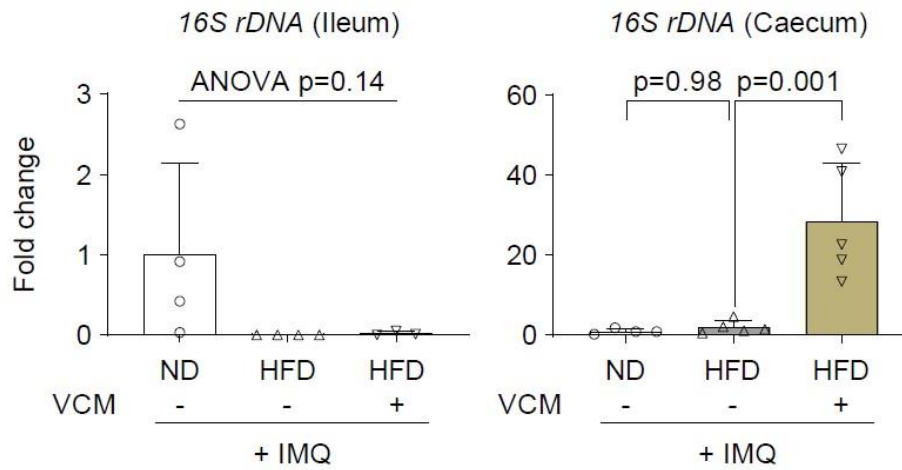

**Figure S9. Real time PCR of intestinal bacteria, related to Figure 5**

C57BL/6 mice were fed with normal diet (ND; 3.3% fat) or high-fat diet (HFD; 35.7% fat) for 8 weeks and were challenged with imiquimod (IMQ); real time PCR of bacterial 16S rDNA in the intestine. ND is the reference group (N = 5). Data are presented as the mean  $\pm$  SD, p-values were calculated by analysis of variance followed by Sidak's post-hoc tests for comparison of groups indicated.

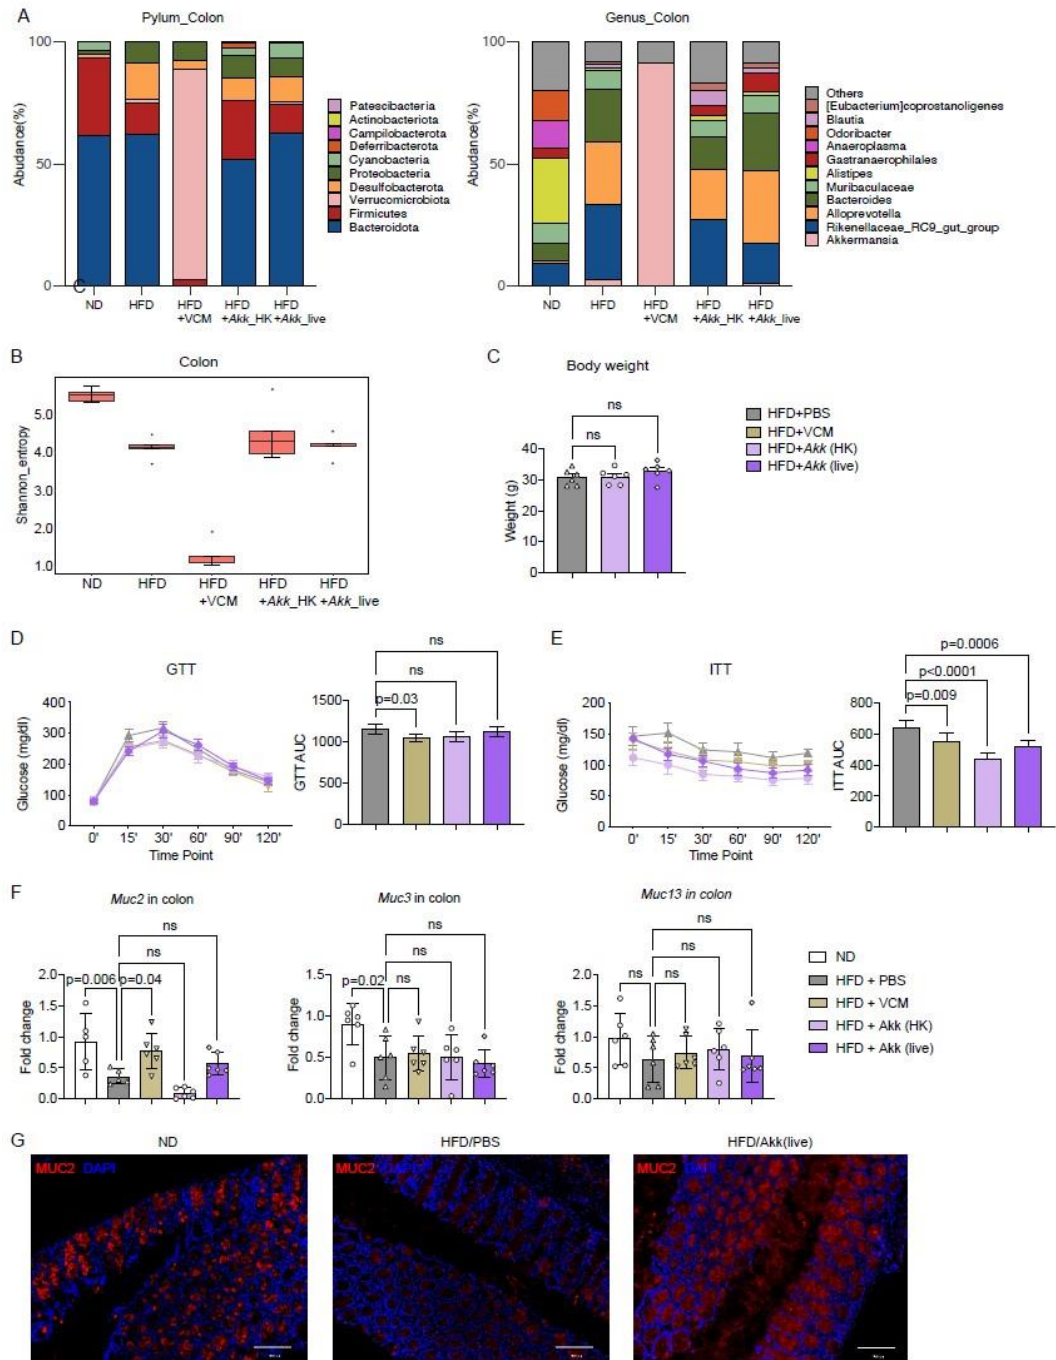

**Figure S10. *Akkermansia muciphila* effects on colon from HFD-fed mice, related to Figure 5**

C57BL/6 mice were fed with normal diet (ND; 3.3% fat) or high-fat diet (HFD; 35.7% fat) for 8 weeks and challenged with imiquimod (IMQ). 0.5 mg/dl of vancomycin (VCM) was administered as drinking water for the last two weeks. (A) Microbiome sequencing analysis of the bacterial 16S rDNA in the colon at the level of phylum and genus (N = 5). (B) Shannon diversity index indicated gut microbiota diversity. (C) Body weight. (N = 6 per group) (D, E) Glucose tolerance test (GTT) (D) and Insulin tolerance test (ITT) (E) were performed on different groups with measurement of blood glucose concentrations (Panel C-E: N = 6). (F) Real time qPCR of mucins mRNA expression in the colon (N = 5-6). (G) Representative pictures of Mucin-2 staining in the colon. Red; Mucin-2, Blue; DAPI. Data are presented as the mean  $\pm$  SD, p values were calculated by analysis of variance followed by Sidak's post-hoc tests for comparison of groups indicated.



**Table S1. Flow cytometry panels, related to STAR Methods (Flow cytometry section)**

|                     | Antigen            | Color           | Dilution |
|---------------------|--------------------|-----------------|----------|
| Panel 1             | Ly6G               | APC             | 1:1000   |
|                     | CD45               | APC-eFluor 780  | 1:1000   |
|                     | Ly6C               | BV421           | 1:1000   |
|                     | CD11c              | PE              | 1:1000   |
|                     | CD11b              | PE-Cy7          | 1:1000   |
|                     | Fc Block           |                 | 1:1000   |
| Panel 2             | CD4                | PerCP-Cy5.5     | 1:1000   |
|                     | CD3                | APC             | 1:1000   |
|                     | CD45               | Alexa Fluor 700 | 1:1000   |
|                     | CD8                | APC-Cy7         | 1:1000   |
|                     | TCR $\gamma\delta$ | BV421           | 1:1000   |
|                     | TCR $\beta$        | BV510           | 1:1000   |
|                     | CD19               | PE              | 1:1000   |
|                     | CD11b              | PE-Cy7          | 1:1000   |
|                     | Fc Block           |                 | 1:1000   |
| Panel 3             | TCR V $\gamma$ 1   | PerCP-Cy5.5     | 1:1000   |
|                     | CD3                | APC             | 1:1000   |
|                     | CD45               | Alexa Fluor 700 | 1:1000   |
|                     | CD11b              | APC-Cy7         | 1:1000   |
|                     | TCR $\gamma\delta$ | BV421           | 1:1000   |
|                     | TCR $\beta$        | BV510           | 1:1000   |
|                     | CD19               | PE              | 1:1000   |
|                     | TCR V $\gamma$ 4   | PE-Cy7          | 1:1000   |
|                     | Fc Block           |                 | 1:1000   |
| Splenocytes sorting | TCR V $\gamma$ 1   | APC             | 1:250    |
|                     | CD19               | APC-Cy7         | 1:500    |
|                     | TCR $\gamma\delta$ | BV421           | 1:500    |
|                     | TCR $\beta$        | BV510           | 1:500    |
|                     | CD3                | PE              | 1:250    |
|                     | TCR V $\gamma$ 4   | PE-Cy7          | 1:500    |
|                     | Fc Block           |                 | 1:500    |

**Table S2. Gradient conditions for HILIC and RP chromatography, related to STAR Methods (Liquid Chromatography - Mass Spectrometry section)**

HILIC, the eluent was A: water, 0.1% formic acid, 10 mM ammonium formate and B: acetonitrile 95%, 5% water, 0.1% formic acid, 10 mM ammonium formate. For RP, the eluent was A: water, 0.1% formic acid and B: methanol, 0.1% formic acid.

| HILIC   |      |       |       | RP      |      |      |       |
|---------|------|-------|-------|---------|------|------|-------|
| t (min) | %A   | %B    | curve | t (min) | %A   | %B   | curve |
| 0.0     | 0.0  | 100.0 | 5     | 0.0     | 99.5 | 0.5  | 5     |
| 2.0     | 0.0  | 100.0 | 5     | 11.0    | 2.0  | 98.0 | 1     |
| 14.0    | 70.0 | 30.0  | 6     | 15.0    | 2.0  | 98.0 | 5     |
| 16.5    | 70.0 | 30.0  | 5     | 15.5    | 99.5 | 0.5  | 5     |
| 17.5    | 0.0  | 100.0 | 5     | 20.0    | 99.5 | 0.5  | -     |
| 30.0    | 0.0  | 100.0 | -     |         |      |      |       |

**Table S3. List of primers used in this study, related to STAR Methods (Real-time PCR section)**

| Gene         | Forward                      | Reverse                       |
|--------------|------------------------------|-------------------------------|
| <i>I117a</i> | 5' TAACTCCCTTGGCGCAAAAG 3'   | 5' TCTTCATTGCGGTGGAGAGTC 3'   |
| <i>I123</i>  | 5' ATCTTCAAAGGGGAGCCTGC 3'   | 5' ATCCTCTGGCTGGAGGAGTT 3'    |
| <i>Tnfa</i>  | 5' CGGCATGGATCTCAAAGACAAC 3' | 5' AGATAGCAAATCGGCTGACG 3'    |
| <i>I16</i>   | 5' TCCTTCTACCCCAATTTCC 3'    | 5' GCCACTCCTTCTGTGACTCC 3'    |
| <i>Gcsf</i>  | 5' TTGCTTCAGCTGGATGTTGC 3'   | 5' TGGAAGGCAGAAGTGAAGGC 3'    |
| <i>Cxcl1</i> | 5' TCCAGAGCTTGAAGGTGTTGCC 3' | 5' AACCAAGGGAGCTTCAGGGTCA 3'  |
| <i>Cxcl2</i> | 5' CATCCAGAGCTTGAGTGTGACG 3' | 5' GGCTTCAGGGTCAAGGCAAAC 3'   |
| <i>Cxc3</i>  | 5' CCCCAGGCTTCAGATAATCA 3'   | 5' TCTGATTTAGAATGCAGGTCCTT 3' |
| <i>Cxcl5</i> | 5' GAAAGCTAAGCGGAATGCAC 3'   | 5' GGGACAATGGTTTCCCTTTT 3'    |
| <i>Ccl4</i>  | 5' TCCCACTTCTGCTGTTTCTC 3'   | 5' TCTGTCTGCCTCTTTTGGTCAG 3'  |
| <i>Ccl20</i> | 5' GTGGGTTTCACAAGACAGATGG 3' | 5' AGGTTACAGCCCTTTTCAC 3'     |
| <i>Muc2</i>  | 5' ATCCCGAAACCACGTCTGCA 3'   | 5' CGCTTCAGGTGCACAGCAAA 3'    |
| <i>Muc3</i>  | 5' GACGGTGTTGAAGACCAAAAC 3'  | 5' GGATGGGGAAGTGGATCTTT 3'    |
| <i>Muc4</i>  | 5' AGATGGACGTCATTGTGCAG 3'   | 5' GCAGTAATTCATGGGACAGGA 3'   |
| <i>Muc13</i> | 5' GCAAGAGCAGCTACCATGAA 3'   | 5' GAGGCCTGAGATGAACTACCC 3'   |

**Table S4. Diet composition, related to STAR Methods (HFD-IMQ mouse model)**

| Component | Catalog No. of the manufacture | Diet 1 | Diet 2<br>(ND) | Diet 3 | Diet 4<br>(HFD) | Diet 5 |
|-----------|--------------------------------|--------|----------------|--------|-----------------|--------|
|           |                                | E15629 | V1534          | E15660 | E15772          | E15149 |
| fat       | % of total Cal                 | 6.0    | 9.0            | 24.0   | 54.0            | 94.0   |
|           |                                | 2.9    | 3.3            | 11.3   | 35.7            | 79.2   |
| sugar     |                                | 62.0   | 4.7            | 0.5    | 17.1            | 0.7    |
| protein   | %w/w                           | 19.1   | 19.0           | 52.5   | 21.6            | 8      |
| starch    |                                | 0.1    | 36.5           | 0.9    | 0.9             | 0.6    |
| others    |                                | 15.9   | 36.5           | 34.8   | 24.7            | 11.5   |
